# Supplementary material for: Clinical Guidelines for the Antimicrobial Treatment of Bone and Joint Infections in Korea
Source: PubMed Central journal article supplement — Infect Chemother. 2014 Jun 20;46(2):125–38. doi: 10.3947/ic.2014.46.2.125 (PMC4091374; doi:10.3947/ic.2014.46.2.125), 2014-06-20
Supplement: ic-46-125-s001.pdf [file ic-46-125-s001.pdf]

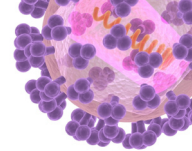

## 국내 골관절감염 항균요법 권고안

대한감염학회, 대한화학요법학회, 대한정형외과학회

## Clinical Guidelines for the Antimicrobial Treatment of Bone and Joint Infections in Korea

The Korean Society for Chemotherapy, The Korean Society of Infectious Diseases, and The Korean Orthopaedic Association

There are many various diseases in the bone and joint infections, and we tried to make antimicrobial treatment guidelines for common infectious diseases based on available data for microbiology and clinical trials. This guidelines focused on the treatment of osteomyelitis and septic arthritis, which can be experienced by physicians at diverse clinical settings. This guidelines is not applicable to diabetic foot infections, postoperative infections or post-traumatic infections which need special considerations. The guidelines for those conditions will be separately developed later. Surgical treatment of bone and joint infections, pediatric bone and joint infection, tuberculous bone and joint infection, and prophylactic antibiotic use were not included in this guideline.

**Key Words:** Osteomyelitis; Septic arthritis; Antimicrobial treatment

### \* 골관절감염 임상진료지침 제정위원회

위원장: 정희진 (고려대학교 구로병원 감염내과)

위 원: 이진수 (인하대학교병원 감염내과), 이재갑 (한림대학교 강남성심병원 감염내과), 최재필 (서울의료원 감염내과), 송준영 (고려대학교 구로병원 감염내과), 하철원 (성균관대학교 삼성서울병원 정형외과), 이재협 (서울대학교 보라매병원 정형외과), 유정준 (서울대학교병원 정형외과), 염재광 (인제대학교 상계백병원 정형외과), 오형근 (인제대학교 일산백병원 정형외과), 인 용 (가톨릭대학교 서울성모병원 정형외과), 이희영 (가천대학교 길병원 암센터)

\* 본 권고안은 2012년 12월 현재 국내 실정에 적합한 골관절감염의 항균요법에 대한 기본적인 원칙을 제시하는 것으로서 모든 환자에 대해서 일률적으로 적용하는 것보다는 지침을 기본적으로 참고하되 개개 환자의 여러 상황을 고려한 의사의 최종적인 판단에 의한 진료에 중요함.

\* 본 권고안은 개인적인 진료 및 교육 목적으로 활용될 수 있으나 상업적인 목적이나 진료 심사 목적 등으로 사용될 수 없으며, 어떠한 형태로든 다른 목적으로 사용하고자 하는 경우에는 제정위원회에 서면 요구서를 제출하여 서면 동의를 얻어야 함.

**Received:** March 31, 2014

**Corresponding Author :** Committee of the Korean Society for Chemotherapy for Clinical Guidelines of Bone and Joint Infection

Korean Society for Chemotherapy, Asterium #1203, Majellan 21, 17 Teheran-ro 87-gil, Gangnam-gu, Seoul 135-880, Korea

Tel: +82-2-557-1755, Fax: +82-2-6499-1755, E-mail: ksc@ksac.or.kr

## 머리말

### 1. 배경 및 목적

골관절 감염은 최근 수년간 임상상에 있어 많은 변화를 보여왔으며, 현대의학의 발전에도 불구하고 임상 의사들에게 여전히 치료가 어렵고 자주 재발하는 질병으로 인식되고 있다. 골관절 감염은 주로 상하지와 척추의 골격계와 관절의 감염을 의미하는데, 크게 골수염과 화농성 관절염으로 나눌 수 있다. 본 진료지침은 일차진료를 담당하는 개원의들에게 우리 실정에 맞는 골관절감염의 항균 요법에 대한 권고안을 제시하고 2, 3차 의료기관의 전공의와 내과, 정형외과 및 신경외과 전문의에게는 항균요법과 더불어 추적조사 필요성 등을 결정하는 근거로 활용될 것이다.

### 2. 범위

본 임상진료지침에서는 국내외 문헌고찰을 통해 얻은 근거를 중심으로 골수염과 화농성 관절염의 항균요법에 대한 권고안을 제시하고자 한다. 골관절 감염의 진단, 당뇨병성 족부감염, 수술 후 감염(인공관절수술 포함) 및 외상 후 감염에 대하여는 향후 별도의 진료지침으로 개발할 예정이다. 골관절 감염의 수술적 치료, 소아의 골관절 감염, 결핵성 골관절 감염과 수술 시 예방적 항균제 사용에 관한 내용은 본 진료지침에 제외하였다.

### 3. 지침 개발방법

#### 1) 지침개발위원회 구성

다학제적 협의를 통한 지침 개발을 위해 감염내과전문의, 정형외과전문의, 예방의학전문을 포함한 총 12인의 개발위원회를 구성하였다.

위원장: 정희진 (고려대학교 구로병원 감염내과)

위 원: 이진수 (인하대학교 병원 감염내과)

이재갑 (한림대학교 강남성심병원 감염내과)

최재필 (서울의료원 감염내과)

송준영 (고려대학교 구로병원 감염내과)

하철원 (성균관대학교 삼성서울병원 정형외과)

이재협 (서울대학교 보라매병원 정형외과)

유정준 (서울대학교병원 정형외과)

염재광 (인제대학교 상계백병원 정형외과)

오형근 (인제대학교 일산백병원 정형외과)

인 용 (가톨릭대학교 서울성모병원 정형외과)

이희영 (가천대학교 길병원 암센터)

#### 2) 지침 범위 설정

지침개발위원회는 진료지침의 범위를 진료지침 개발방법인 PIPPOH (Population, Intervention, Professionals, Outcomes, Healthcare setting)의 다섯 가지 항목을 통해 구체화하였다. 질병 혹은 상태(Population), 주제가 되는 중재방법(Intervention), 진료지침의 목표사용자(Professionals), 진료지침이 관심을 두고 있는 환자 결과(생존률 증가나 삶의 질 개선)나 공중보건 결과(Outcomes), 진료지침이 사용될 보건의료환경(Healthcare setting)에 대해 개발위원회 회의를 거쳐 결정하였다.

#### 3) 핵심 질문 도출

진료지침의 개발 과정은 특정한 질환 혹은 건강상의 문제를 진단 및 치료하는데 있어 답변이 필요한 일련의 임상질문을 선정하고 이에 대한 근거수집과 분류작업을 거쳐 해당 질문에 적합한 권고안을 작성하는 단계적 과정으로 진행된다. 따라서 핵심질문을 정의하는 것은 근거의 수집과 평가를 시작하는 첫 단계라 할 수 있다. 이를 위해 지침개발위원회는 기존의 국내외 임상진료지침과 문헌을 검토하여 핵심 질문을 도출하였다.

#### 4) 근거 검색

체계적인 문헌검색을 위하여 1975년 1월부터 2012년 12월까지 국내외에서 출판된 지침과 관련된 문헌을 PubMed ([www.pubmed.gov](http://www.pubmed.gov))를 이용하여 검색하였다. 국내 문헌고찰은 같은 기간 동안 KoreaMed (<http://www.koreamed.org>)와 한국의학논문데이터베이스(Korean Medical Database, [kmbase.medric.or.kr](http://kmbase.medric.or.kr))를 이용하여 검색하였다.

외국 문헌의 경우 먼저 Pubmed에서 검색문장("Arthritis, Infectious" [Mesh] OR septic arthritis) AND (guideline OR systematic[sb])으로 진료지침과 체계적 문헌고찰을 검색하여 선택하였다. 이어 선택된 문헌에 포함된 일차문헌을 검토하였고 핵심질문 관련한 내용이 없는 경우 추가 검색을 시행하였다.

#### 5) 권고안 작성 및 권고수준 결정

개발위원회에서 각 핵심질문에 대한 문헌을 검토하여 권고안 초안 문장과 근거수준(I, II, III)을 작성하였다. 권고수준 결정에는 일반화 가능성, 실제 임상현장에서 일관성 있게 적용 가능한지 등을 세밀하게 고려해야 하므로, 개발위원회 전체 회의를 통해 등급(A, B, C)을 결

**Table 1.** Strength of recommendation and quality of evidence for recommendation

| Strength of recommendation     | Quality of evidence for recommendation                        |
|--------------------------------|---------------------------------------------------------------|
| A: Should always be offered    | I: One or more properly designed randomized, controlled trial |
| B: Should generally be offered | II: One or more well-designed, nonrandomized trial            |
| C: Optional                    | III: Expert opinion, descriptive studies                      |

정하였다..

본 개발위원회는 미국감염학회의 근거 및 권고 수준 등급을 이용하였다(Table 1).

#### 6) 외부검토 및 승인

위원회에서 제작한 진료지침을 2012년 4월 14일 대한화학요법학회에서 발표하였다. 학회에서 공개적으로 전문가그룹과 학회회원의 의견을 수렴하였고 이를 바탕으로 일부 수정을 거쳐서 최종 지침을 완성하였다.

## 임상진료지침

### 1. 골수염

#### 1) 역학과 분류

골수염은 감염성 미생물에 의한 골조직의 염증성 변화와 동반된

**Table 2.** Waldvogel's osteomyelitis classification system

|                                               |
|-----------------------------------------------|
| Hematogenous osteomyelitis                    |
| Contiguous osteomyelitis                      |
| Accompanied by systemic vascular diseases     |
| Not accompanied by systemic vascular diseases |
| Chronic osteomyelitis                         |

**Table 3.** Cierny-Mader's osteomyelitis classification system

|                                                                                                                                                                                       |
|---------------------------------------------------------------------------------------------------------------------------------------------------------------------------------------|
| Anatomical type                                                                                                                                                                       |
| Type I: Medullary                                                                                                                                                                     |
| Type II: Superficial                                                                                                                                                                  |
| Type III: Localized                                                                                                                                                                   |
| Type IV: Diffused                                                                                                                                                                     |
| Physiological condition                                                                                                                                                               |
| A: Healthy                                                                                                                                                                            |
| B: Systemically compromised, Bs                                                                                                                                                       |
| Locally compromised, Bl                                                                                                                                                               |
| Systemically and locally compromised, Bls                                                                                                                                             |
| C: The majority of damage is due to treatment rather than disease                                                                                                                     |
| Factors influencing immunity, metabolism, and local blood supply                                                                                                                      |
| Systemic factors (Bs): Malnutrition, chronic renal failure, liver failure, diabetes mellitus, chronic hypoxia, neonate/elderly, malignancy, immunosuppression or immune deficiency.   |
| Local factors (Bl): Chronic lymphedema, venous stasis, major vessel compromise, arteritis, large scar formation, post-radiation fibrosis, small-vessel disease, neuropathy or smoking |

골파괴로 정의할 수 있다[1]. 증상 발생 후 시간경과에 따라서 급성, 아급성 및 만성으로 분류해 왔다. 그러나 골수염은 이환 기간뿐만 아니라 발병기전, 발병부위, 국소 혈류 등 여러 요소가 관여하는 복합적인 질환으로 이를 고려한 분류법이 개발되어 사용되고 있다. 1970년에 발표된 Waldvogel 분류법은 골수염을 발병기전과 이환 기간에 따라서 크게 혈행성(hematogenous), 접촉성(contiguous)과 만성(chronic)으로 나누었으며, 접촉성 골수염은 전신혈관질환 동반 여부에 따라 세분화하였다(Table 2). Waldvogel 분류법은 발병 원인에 따른 분류로 원인균을 추정하여 경험적 치료 항생제를 결정하는 데 도움이 된다[2]. 혈행성 골수염은 전체 골수염의 대략 20%를 차지하며 소아에서 주로 발생한다. 주사용 약물남용과 연관되어 발생하는 경우는 척추침범이 흔하다[3]. 혈행성 골수염은 사회경제 수준의 변화 및 의료기술의 발전과 더불어 발생빈도가 감소하는 반면에 교통사고, 인공관절 시술의 증가 등으로 접촉성 골수염 발생률은 증가하고 있다. 접촉성 골수염은 전체 골수염의 약 80%를 차지하며 연부조직 감염에 병발된 형태 또는 수술/외상과 관련하여 발생하며 소아보다는 성인에서 흔하다. 접촉성 골수염은 감염부위 주위 혈류장애나 인공삽입물과 관련하여 발생하는 경우가 많으며 이런 경우 치료실패율이 높다.

Cierny-Mader 분류법은 급성이나 만성 등 이환 기간에 따른 분류는 없으나 감염된 골부위의 해부학적 특징, 환자의 생리적 상태 및 치료반응에 영향을 미치는 국소적인 요인에 따라서 분류하였다(Table 3, Fig. 1) [4]. Cierny-Mader 분류법은 긴뼈(long bone) 골수염의 치료법 결정과 예후 파악에 장점이 많아 임상에서 주로 사용되고 있는데, 수술 시행여부와 수술방법을 결정하는데 유용하다. 유형 1 골수염은 염증이 수질부 내에 국한된 경우로 주로 초기 혈행성 감염의 경우가 이에 해당한다. 유형 2 골수염은 주위 연부조직의 감염에 병발된 형태로 대부분 접촉성 전파로 발생한다. 유형 3 골수염은 피질부가 주로 감염되어 뼈의 안정성은 유지되지만 골사조직을 제거해야 할 필요가 있는 경우이다. 유형 4 골수염은 뼈의 전층이 감염되어 감염부위 전체의 완전 제거가 필요하므로 구조적 안정성이 소실될 수밖에 없는 경우이다. 그러나 Cierny-Mader 분류법의 골수염 병기는 환자의 건강상태, 항균제 및 기타 치료의 영향으로 역동적으로 변화할 수 있다. 단, 이러한 분류법은 인공관절 주위 골수염(peri-prosthetic osteomyelitis), 척추염(vertebral osteomyelitis) 등의 특수한 상황의 골수염에는 적용할 수 없다.

#### 2) 원인균분포

골수염의 원인균으로는 *Staphylococcus aureus*가 가장 흔하고, Enterobacteriaceae, coagulase 음성 staphylococci, streptococci (교상, 욕창, 당뇨병성 족부감염) 등 또한 흔한 원인균이다.

골수염의 원인균 동정은 환자의 진단과 효과적인 치료를 위해 매우 중요하다. 국외 자료에 의하면 모든 유형의 골수염에서 *Staphylococcus aureus*가 가장 흔한 골수염의 원인균이고, Enterobacteriace-

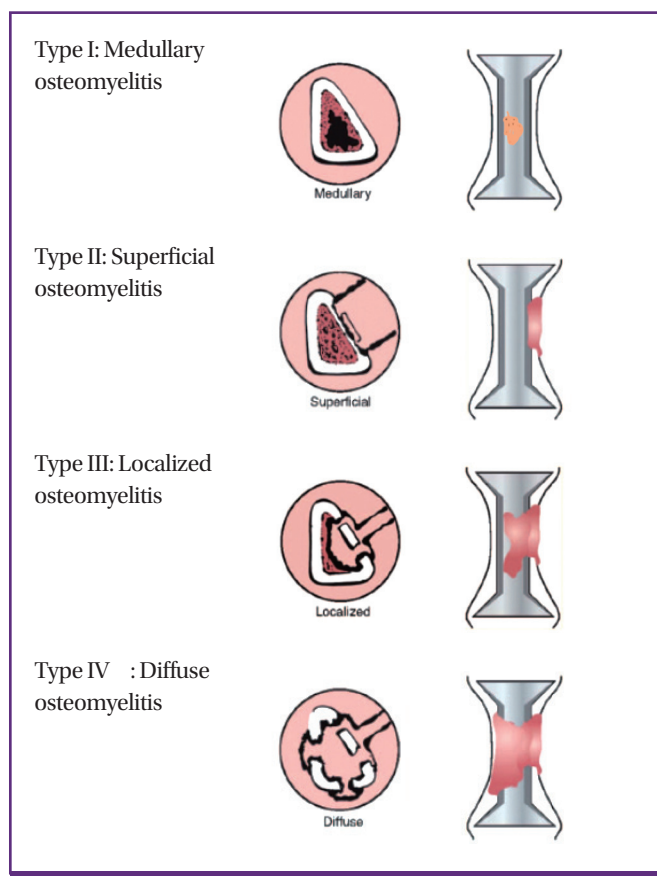

**Figure 1.** Cierny-Mader classification of osteomyelitis according to the anatomical extent.

ae, coagulase 음성 staphylococci, streptococci (교상, 욕창, 당뇨병성 족부감염) 등 또한 흔한 원인균이다 [1, 5, 6]. *Pseudomonas aeruginosa*는 원내획득 골수염의 흔한 원인균이다. 결핵성 골수염은 AIDS 환자의 증가와 더불어 최근 증가하고 있는 반면, 진균감염은 여전히 매우 드물다. 척추골수염에 국한된 국내자료를 보면, 총 101건 중 원인균이 검출된 경우가 71건이었고 이 중 *Staphylococcus aureus* 36.6%로 가장 흔하였으며 *S. aureus*의 19.2%가 methicillin 내성이었다. 다음으로 viridans group streptococcus가 18.3%, *S. agalactiae*가 8.5%, *Streptococcus pneumoniae*가 4.2%, 그람음성균은 18.3%로 *Escherichia coli*가 9.9%, *P. aeruginosa*가 4.2%순이었다[7]. 다른 국내 자료에 의하면 척추 골수염 93예 중 *S. aureus*가 37예(39.8%)로 가장 많았고 이 중 37.8%가 methicillin 내성이었으며 *Staphylococcus epidermidis*가 12.9%, streptococcus가 16.1%이었다. 원인균이 그람음성균인 경우는 24.7%로 *E. coli*가 12.9% 가장 많았고 *Klebsiella pneumoniae*가 3.2%, *P. aeruginosa*가 2.2%순으로서 연구 간 큰 차이가 없었다[8].

세균성 골수염의 원인균 분포는 환자의 연령, 전파경로에 따라 달라질 수 있으며 발현된 임상상에 따라서도 다르다[6, 9]. 연령별로 살펴보면, 건강한 소아에서 발생하는 혈행성 골수염의 90%는 *S. aureus*

**Table 4.** Major causative organisms according to patient age

|                                  |
|----------------------------------|
| Infants ( $\leq 1$ year)         |
| Group B streptococci             |
| <i>Staphylococcus aureus</i>     |
| <i>Escherichia coli</i>          |
| Child/youth (1–16 years)         |
| <i>Staphylococcus aureus</i>     |
| <i>Streptococcus pyogenes</i>    |
| <i>Haemophilus influenza</i>     |
| Adult ( $>17$ years)             |
| <i>Staphylococcus aureus</i>     |
| <i>Pseudomonas aeruginosa</i>    |
| <i>Serratia marcescens</i>       |
| <i>Escherichia coli</i>          |
| Coagulase negative staphylococci |

**Table 5.** Major causative organisms according to clinical conditions

| Clinical situation   | Microorganism                                                                               |
|----------------------|---------------------------------------------------------------------------------------------|
| Bite wound           | Streptococci, anaerobic bacteria, <i>Pasteurella multocida</i> , <i>Eikenella corrodens</i> |
| Decubitus ulcer      | Streptococci, enterococci, anaerobic bacteria                                               |
| Nosocomial infection | <i>Pseudomonas aeruginosa</i> , Enterobacteriaceae                                          |

가 원인이며, b형 헤모필루스균 (*Haemophilus influenza* type b; Hib) 백신접종을 받지 않은 경우는 헤모필루스균에 의한 혈행성 골수염 또한 흔하다(Table 4) [2, 5, 6]. 성인에서 발생하는 혈행성 골수염은 주로 *S. aureus*, *S. epidermidis*, *P. aeruginosa*, *Serratia marcescens* 및 *E. coli* 등이 원인이 된다.

혈행성 골수염은 대개 단일균주에 의한 감염이나, 접촉성 골수염은 단일균주 감염 또는 여러 균주에 의한 혼합감염 모두 가능하다[5]. 혈류장애가 있는 경우는 대개 *S. aureus*, coagulase 음성 staphylococci, Enterobacteriaceae, streptococci, enterococci, 혐기균 등에 의한 혼합감염이 발생할 가능성이 높다. 인공삽입물 관련 골수염의 원인균으로는 *S. aureus*가 가장 흔하고, *S. epidermidis*, *P. aeruginosa*, *Propionibacterium* spp. 등도 고려해야 한다(Table 5) [1, 5]. 그밖에 환자의 면역수준, 지역적 특성(토착균), 직업력, 여행력 등에 따라 *Brucella* spp., *Coxiella burnetii* (Q열), 진균감염 등의 가능성도 생각할 수 있다. Candida 골수염은 candida 감염의 위험인자(광범위 항생제 투여, 중심정맥관 삽입 등)가 있는 환자에서 발생한 골수염의 경우 의심해야 하며, 배농성 상처부위에서 다른 균 분리 없이 반복적으로 *Candida* spp.가 동정되는 경우 역시 의심할 수 있다.

### 3) 임상소견

골수염은 혈류감염을 통해서 이차적으로 발생(혈행성 골수염)할 수 있고, 인접 연부조직 또는 관절 감염, 수술이나 외상과 관련하여 발생(접촉성 골수염)할 수도 있다[1, 5, 6]. 혈행성 골수염은 주로 소아에서, 접촉성 골수염은 주로 성인에서 발생한다.

급성 골수염(특히 혈행성)은 수일에 걸친 병변부 통증으로 나타난다. 소아에서는 특히 발열, 흥분, 기면과 같은 전신증상이 동반되며 압통, 열감, 발적 및 부종 등과 같은 국소증상이 동반된다[1]. 그러나, 척추, 고관절 또는 골반 골수염의 경우는 통증 이외에 특별한 증상이나 징후가 없는 경우가 많다. 또한, 급성 골수염은 긴뼈의 뼈몸통끝(metaphysis, 소아) 또는 뼈몸통(diaphysis, 성인)에서 가장 흔히 생기고, 경우에 따라서는 인접 관절로 파급되어 화농성 관절염으로 진행되기도 한다. 대개 병변부 뼈는 진찰시 압통을 보이며 주변 관절의 운동범위 제한소견이 관찰될 수 있다.

아급성 골수염은 대개 수주일에 걸친 정도의 압통으로 나타나며 발열과 전신증상은 드물다.

만성 골수염은 일반적으로 병변부 만성 통증만을 호소하는 경우가 많다. 열이 있더라도 미열을 보인다. 또한, 만성 골수염의 특징적인 소견인 국소적인 뼈소실, 부골형성, 골경화증, 배농성 누공(sinus tract) 등이 관찰될 수 있다[1]. 만성 골수염은 더 이상 진행하지는 않는 정지형으로 발견되기도 하지만 서서히 진행할 수도 있으며 배농성 누공이 막히는 경우에는 국소적인 농양이나 급성 연부조직 감염으로 나타날 수 있다.

### 4) 진단

1. 급성 혈행성 골수염은 특징적으로 수 일에 걸친 병변부 통증과 발열 등 전신증상을 보이고, 만성 골수염은 경미한 전신증상과 함께 장기간에 걸친 병변부 통증, 배농성누공(sinus tract) 등 특징적 병변을 보인다. 이러한 소견이 관찰되면 골수염을 의심해야 한다(AIII).
2. 골수염 의심 환자에 대해서는 진료 시 자세한 문진과 진찰 후 의심되는 부위의 단순 X-ray 검사를 시행하고, 일반혈액검사(complete blood count, CBC) 및 백혈구 백분율(differential count), C-반응 단백질(C-reactive protein, CRP), 적혈구침강속도(erythrocyte sedimentation rate, ESR) 등의 혈액검사를 시행해야 한다(AIII).
3. MRI는 골수염 조기진단에 가장 효과적인 선택적 검사법이다(AI). 골스캔은 금속보형물로 CT나 MRI를 시행하기 어려운 환자에서 시행할 수 있다(BIII).
4. 혈액, 관절액 및 골조직 검체는 항균제 투여 전에 채취하는 것을 원칙으로 한다(AIII).
5. 균 동정을 위한 누공의 면봉 배양검사는 신뢰할 수 없으며, 수술적 또는 경피적 조직검사(초음파, 컴퓨터단층촬영 또는 투시검사 활용)를 통한 균배양 검사가 효과적이므로 시행해야 한다(AII). 골수염이 의심되면 골수염 진단의 민감도를 높이기 위하여 골조직 배양검사와 함께 골조직 병리검사를 함께 시행할 수 있다(BII).

급성 혈행성 골수염은 특징적으로 수 일에 걸친 병변부 통증과 발열 등 전신증상을 보인다. 반면에, 만성 골수염은 경미한 전신증상과 함께 장기간에 걸친 병변부 통증, 배농성 누공(sinus tract) 등 특징적 병변을 보인다. 따라서 이런 소견이 관찰되면 골수염을 의심해야 한다(AIII).

골수염이 의심되는 환자의 진료 시, 자세한 문진과 진찰 후 의심되는 부위의 단순 X-ray 검사를 시행하고, 일반혈액검사(complete blood count, CBC) 및 백혈구 백분율(differential count), C-반응 단백질(C-reactive protein, CRP), 적혈구침강속도(erythrocyte sedimentation rate, ESR) 등의 혈액검사를 시행해야 한다(AIII).

#### (1) 혈액검사

혈액검사 소견은 비특이적이거나 급성 골수염에서는 백혈구수, CRP, ESR가 흔히 상승해있다. 만성 골수염은 급성 골수염과 달리 백혈구수는 대개 정상이며, ESR이 특징적으로 증가한다. 골수염에서 ESR, CRP는 대개 상승해 있지만 환자 상태에 따라서 정상일 수도 있으며 [10, 11], 일반혈액검사(complete blood count, CBC) 및 백혈구 백분율(differential count)은 골수염 유무를 감별하는데 유용하지 않다 [12]. 대사성 골 질환이나 전이성 암 질환과 달리 골수염 환자의 alkaline phosphatase (ALP), 칼슘(calcium), 인(phosphate) 등의 혈중 농도는 정상이다.

#### (2) 영상의학검사

급성 골수염의 초기 약 2주경까지는 단순 X-ray 사진의 변화를 확인하기 어렵다. 가장 먼저 관찰되는 골변화는 국소적인 골감소(osteopenia) 소견이며 단순 X-ray상 골파괴 소견은 골기질(bone matrix)의 50-75%가 손상된 후에야 관찰된다. 따라서, 급성 골수염 진단에 있어 단순 X-ray 사진의 유용성은 낮다.

만성 골수염의 진단에 있어서는 단순 X-ray 검사가 매우 유용하다. 특징적인 소견은 골피질의 미란(cortical erosion), 골막반응(periosteal reaction), 골 투명화 및 경화(mixed lucency and sclerosis) 등이다. 단순 X-ray 소견은 정상이지만 골수염이 의심되는 소견(국소적증상, 당뇨 등의 고위험군인 경우, ESR 상승 등)이 있으면 핵의학 검사, 컴퓨터단층촬영(computed tomography, CT), 혹은 자기공명영상촬영(magnetic resonance image, MRI) 등 보다 정밀한 영상의학검사를 시행해야 한다.

핵의학 검사로는 <sup>99m</sup>Tc 골스캔이 가장 유용하지만 특이도가 낮아 신경성 병변, 퇴행성 관절염, 수술 후 변화, 치유되고 있는 골절, 통풍 또는 비감염성 염증 등과 감별이 어렵다. 즉, 골스캔은 민감도가 95% 이상이지만, 골절 또는 다른 비감염성병변이 있는 경우는 위양성률이 높다. 그러나 골스캔은 금속보형물로 인해서 CT나 MRI를 시행하기 어려운 환자에서 선택적으로 시행할 수 있는 검사법이다(BIII). 당뇨족 감염과 같이 연부조직 감염이 함께 있는 경우는 3상 골스캔(3-phase bone scan)을 시행해야 한다[13].

MRI는 골수염 조기진단에 가장 효과적인 선택적 검사법으로 몸통뼈대(axial skeleton)나 골반뼈의 골수염 혹은 추간판염(discitis), 감염성 관절염이 의심될 때 유용하다(AI)[14]. 진단의 민감도나 특이도는 골스캔과 비교해 비슷하거나 높으며, 감염의 해부학적 위치나 범위(동반된

근염, 근막염, 연부조직 감염 등)를 정확히 알 수 있는 장점이 있다.

CT는 골피질(cortical bone)과 골기둥(trabecular bone)의 안정성, 골막의 이상반응, 골내가스 등을 파악하는 데 유용하다. MRI, CT, 핵의학 검사 등에서 골수염의 소견이 보이지 않는 경우라면 실제 골수염이 있을 가능성은 매우 낮다.

### (3) 배양검사

원인균 규명을 위한 누공(sinus tract) 배양검사는 신뢰할 수 없으며, 수술적 또는 경피적 조직채취(초음파, CT 또는 투시검사 활용)를 통한 균 배양검사가 효과적이다(A II). 만성 골수염 환자를 대상으로 한 연구에 따르면, 누공배양 결과와 심부 수술조직 배양결과의 일치도는 44%로 낮아 누공배양검사에서 분리된 미생물이 실제 원인균일 확률은 매우 낮다[15]. 조직 배양검사 방법 중에서는 수술적 골조직 배양검사가 경피적 골조직 배양검사보다 선호되는데, 이는 경피적 골조직 검체채취는 검사 중 오염발생 가능성이 더 높기 때문이다. 실제 당뇨성 족부 골수염 환자를 대상으로 한 연구에서 수술적 골조직 배양검사와 경피적 골조직 배양 검사의 일치도는 23%에 불과했다[16]. 또한 경피적 조직배양검사는 외상 또는 수술후 골수염 환자에서도 민감도가 낮은 것으로 알려져 있다. 따라서, 임상적으로 골수염이 의심이 된다면 경피적 조직배양검사를 반복해서 시행하거나 처음부터 수술적 조직배양검사를 고려해야 한다.

조직은 적어도 두 개 이상을 얻어 한 개는 그람염색과 세균배양검사를 시행하고, 나머지 한 개는 조직병리검사를 시행하도록 한다. 배양을 위한 조직은 괴사조직을 피해서 살아있는 부위에서 얻어야 하고, 크기가 2×1cm 정도가 적당하다. 표재성 면봉도말(swab) 검체는 가능한 피한다. 의뢰하고자 하는 배양 종류 별로 추가적인 조직을 채취해야 한다. 골수염에서의 최적의 조직 배양 수는 결정되어 있지 않다. 채취한 검체는 마르지 않게 운송해야 하며 혐기성 배양이 가능한 운송배지를 사용하는 것이 좋지만, 조직이 크면 혐기성 운송배지를 사용하지 않아도 된다. 30분 이내에 미생물 검사실로 보내야 한다. 조직은 고형상인 경우 균질화 장비(tissue homogenising apparatus)로 균질화한 뒤 배양하고, 균균배양, 정량배양 등을 통해 민감도와 특이도를 높일 수 있다. 운송이 지연될 경우에도 냉장 보관하면 안되며 상온에서 가급적 빨리 검사실로 보낸다. 심부조직은 호기성과 혐기성 세균배양을 실시해야 하고, 진균, 미코박테리아 감염이 의심될 때는 해당 배양을 별도로 의뢰해야 한다[17].

골조직 검체는 항균제 투여 전에 채취하는 것을 원칙으로 한다(A III). 이미 항균제가 투여된 환자에서도 병변부 골경색 또는 허혈이 동반되어 있다면 골조직배양 양성일 가능성이 높아진다. 배양검체 채취 48-72시간 전에 항균제 투여를 중단하면 배양 양성률을 높일 수 있다. 골조직 배양을 위한 경피적 조직 채취는 상처나 염증이 없는 부위를 통해서 시행해야 한다. 골조직 배양은 혈액배양 양성인면서 영양상학검사상 전형적인 골수염 소견을 보이는 경우와 이전에 원인균이 동정된 바 있는 재발성 골수염의 경우에는 시행할 필요가 없다.

혈액배양검사는 급성 골수염의 50%에서 양성이며, 특히 척추(vertebra), 쇄골(clavicle)과 치골(pubis)에 발생한 혈행성 골수염에서 양

성률이 높다[2, 18, 19]. 혈액배양검사서 원인균이 동정되는 경우에는 불필요한 침습적 검사를 줄일 수 있으므로 반드시 혈액배양검사를 시행해야 한다.

### (4) 병리조직검사

골수염의 병리조직학적 소견은 골 파쇄(fragmentation) 또는 괴사(necrosis)에 동반된 염증세포의 침윤이다. White 등[20]의 연구에 따르면 골수염 진단에 있어서 미생물학적 배양검사의 민감도는 42%였으며, 배양검사에 병리조직검사를 추가한 경우 민감도는 84%에 달했다. 따라서, 골수염 진단의 민감도를 높이기 위해 배양검사와 함께 골조직 병리검사를 시행할 수 있다(B II).

### (5) 분자유전학검사

분자유전학 검사법은 *Bartonella henselae*, *Brucella* spp., *Mycobacterium* spp. 등 배양조건이 까다로운 병원체에 의한 골수염을 진단하는데 도움이 된다[21]. 골수염이 의심되나 배양음성인 경우, 혼합 감염이 의심되는 경우 등에서 16S rRNA 유전자를 이용한 중합효소연쇄반응 등의 분자생물학적 검사가 도움이 될 수 있다[22].

## 5) 치료

### (1) 골수염의 일반적 치료원칙

1. 급성 골수염에서 균혈증과 골괴사 및 파괴의 진행을 줄이기 위해서는 적절한 항균제를 신속히 투여해야 한다(AI).
2. 급성 골수염에서 농양 형성이나 괴사의 방사선학적 증거가 있거나 항균제 치료에 반응이 없는 경우 수술을 시행해야 한다(A II).
3. 만성 골수염의 치료를 위해서는 다학제적인 팀접근이 필요하다. 괴사조직의 충분한 제거, 뼈의 안정화, 사강(dead space) 처리, 연부조직 재건 등의 수술적 치료와 동정된 균주에 감수성인 항균제의 선택 및 적절한 용량을 사용하고 치료기간을 준수해야 한다(AIII).
4. 만성 골수염의 치료를 위해서 환자의 영양상태 개선, 금연, 혈당조절, 혈류 개선 등 환자 측 부정적 인자를 최대한 교정해야 한다(AIII).
5. Cierny-Mader의 분류에 따라 수술 여부와 항균제 사용 기간을 결정한다. 일반적으로 괴사조직 제거술(debridement) 시행 후 추가 4-6주의 항균제 치료를 권하지만 병기와 환자 상태에 따라서 개별화하여야 한다(AI).

급성골수염에서는 균혈증과 골괴사 및 파괴의 진행을 줄이기 위하여 적절한 경험적 항균제를 신속히 투여하고 배양검사 결과를 기다려야 한다. 혈액배양 및 흡인 또는 조직 배양 이후 가장 흔한 원인균인 *S. aureus* 등에 항균력이 있는 항균제를 즉시 투여한다(AI)[5, 23]. 배양 및 감수성 결과에 나온 후 사용중인 경험적 항균제 선택에 문제가 있다고 판단되면 즉시 감수성 결과에 따라 적절한 항균제로 전환하여야 한다. 모든 급성 골수염에서 수술적 치료가 반드시 필요한 것은 아니나 가능하다면 초기에 정형외과적인 수술이 필요한지를 고려하

여야 한다. 급성 골수염에서 임상적 또는 영상학적인 검사상 농양 또는 괴사가 있거나 의심되는 경우, 동정된 원인균에 감수성이 있는 항균제를 투여하였음에도 호전이 없는 경우에는 수술적 치료를 적극적으로 고려해야 한다(A II)[24]. 급성 골수염의 예후는 진단시기가 중요하여 진단과 치료 시작이 신속했던 경우는 후유증이 없이 90% 정도에서 호전되는 것으로 알려져 있다[3].

만성 골수염은 다학제적인 접근을 통한 괴사조직의 충분한 제거, 뼈의 안정화, 사강(dead space) 처리, 연부조직 재건 등의 수술적 치료가 중요하며, 동정된 균주의 감수성 결과에 따라 적합한 항균제를 선택하여 적절한 용량, 용법으로 치료기간을 준수해야 한다(A III). 만성 골수염의 수술 시에는 감염 또는 괴사된 골조직의 완전한 제거를 목표로 해야 하는데, 감염 또는 괴사된 조직의 불충분한 제거는 재발

#### Type I Medullary osteomyelitis

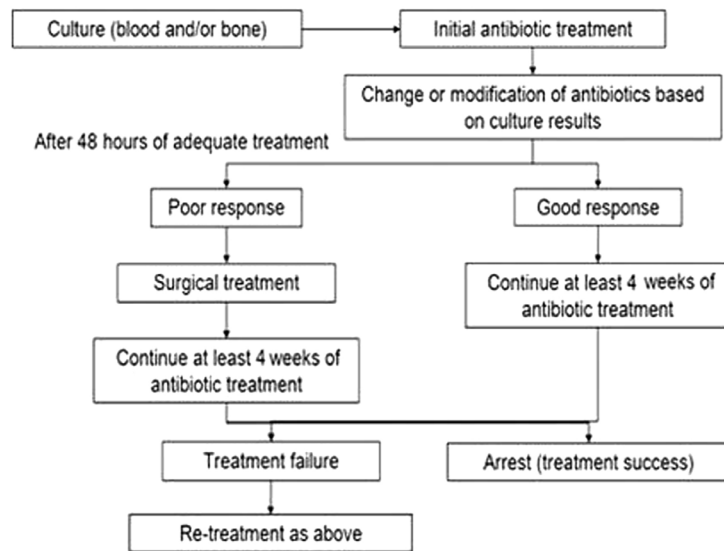

#### Type II Superficial osteomyelitis

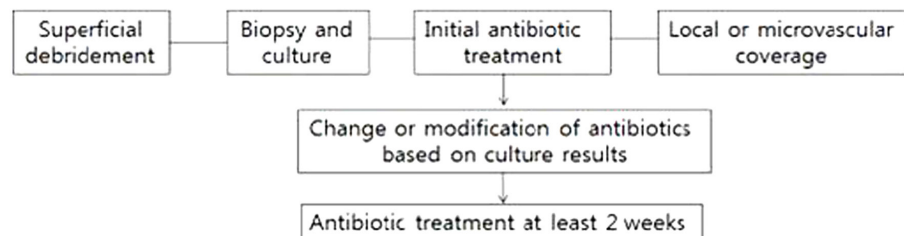

#### Type III or IV Localized or diffuse osteomyelitis

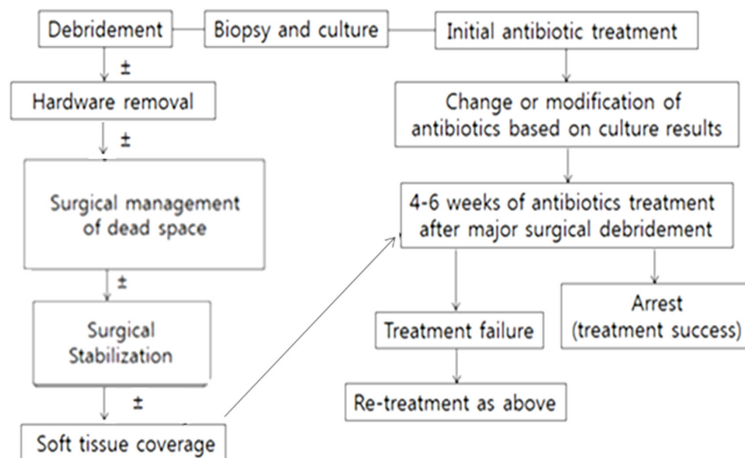

**Figure 2.** Treatment algorithm for adult long bone osteomyelitis (Figures modified from Lazzarini et al. [27] Reprinted with permission from The Journal of Bone and Joint Surgery).

의 원인이 되기 때문이다. 따라서, Figure 2에서 제시하고 있는 알고리즘에 따른 치료가 필요하다[5, 25-27]. 환자의 영양상태 개선, 금연, 혈당조절, 혈관부전 등 환자 측의 부정적 인자를 최대한 교정하는 것이 치료 예후 개선에 중요하다(AIII).

급성 또는 만성 골수염의 구분과는 별도로 Cierny-Mader의 분류에 따라 골수염의 치료에 있어 수술 여부와 항균제 사용기간을 결정한다. 일반적으로, 괴사조직 제거술(debridement) 4주 후 혈관 재형성이 일어난다는 동물실험을 근거로 수술 후 대개 4-6주의 추가 항균제 치료를 권고하지만 최적의 치료기간은 환자 상태에 따라서 개별적으로 결정해야 한다(AI). 그러나 하지의 만성 골수염의 경우 괴사 및 감염조직을 충분히 제거하고 혈관상태가 양호한 피판(flap) 수술을 병행하였을 때 항균제 투여기간을 줄일 수 있었던 동물실험 및 임상 자료가 있어 치료기간을 단축해도 될 가능성이 있다[25].

해부학적 분류인 Cierny-Mader의 분류에 따른 성인 만성 골수염의 수술적 치료 원칙과 항균제 사용기간은 다음과 같다(Fig. 2). 모든 유형에서 항균제 사용의 기간은 환자의 임상 상태에 따라 개별화해야 한다.

유형 1 수질 골수염(medullary osteomyelitis): 소아는 골혈관 분포가 좋아 항균요법만으로도 치료 효과가 비교적 높으나 성인의 경우는 그렇지 않다. 항균요법만으로도 치료할 수 있는 경우는 수질 골수염 중에서도 혈행성 척추골수염, 내과적 검진 중 우연히 발견되는 무증상 병변, 약제 감수성인 결핵이나 진균성 골수염 등이다. 그 이외에는 균막(biofilm)이 이미 만들어져 있는 경우가 많으므로 수술적 치료로 병소를 제거해 주어야 한다. 항균제 치료기간은 최소 4주 또는 마지막 수술 후 최소 4주를 유지한다. 초기 항균제 치료에 불응하는 경우는 수술적 치료와 함께 최소 4주의 추가 항균제 치료를 필요로 한다.

유형 2 표재 골수염(superficial osteomyelitis): 유형 2의 경우는 연부조직 결손이 발생하므로 연부조직을 재건해주는 것이 중요하다. 골피질의 죽은 조직을 수술적으로 제거하고 연부조직을 재건한 이후 최소 2주간의 추가 항균제 치료가 필요하다. 환자의 생리학적 상태에 따른 치유율은 국소 또는 전신적 장애가 있는 환자군(B)에서 79%, 건강한 환자군(A)에서 100%로 보고되고 있다[28, 29]. 혈관지표, 피부장력과 결손 정도를 조사하고, 혈관 조영술 등을 시행하여 재생 가능성을 평가하여 유형 3의 병변이 아닌 것을 확인해야 한다.

유형 3 국소 골수염(localized osteomyelitis): 유형 3에서는 마지막 수술 이후 4-6주간 항생제 치료를 유지한다. 이 단계에서는 괴사조직이 제거되었다 하더라도 기저부는 오염된 것으로 간주한다. 치유율은 건강한 환자군(A)에서 98%, 국소 또는 전신 장애가 있는 환자군(B)에서는 92% (유형 3)에 달했다는 보고가 있다[29]. 유형 3 골수염에서 괴사 골조직의 광범위한 제거술 후 골의 불안정성이 있는 경우 외고정을 시행할 수 있으며, 항균제 혼합 시멘트 삽입 및 연부 조직 재건술을 고려한다.

유형 4 미만 골수염(diffuse osteomyelitis): 유형 4에서는 유형 3과 마찬가지로 마지막 수술 이후 4-6주간 항균제 치료를 유지한다. 유형 4에서는 뼈의 구조적 불안정성을 해결하고 죽은 조직을 제거하는 수술이 필요하며, 대부분 단계적인 재건술이 요구된다. 또한, 연

부조직 복원과 결손된 뼈의 재건을 위한 수술적 치료가 필요하다. Cierny [29]는 단계에 따른 수술 및 항균제 치료 후 2년 추적하였을 때 치료 성공율을 85% (건강한 환자군(A) 96%, 국소적 또는 전신적 장애가 있는 환자군(B) 74%)로 보고하였다[30].

## (2) 골수염의 항균제 치료

1. 혈액 및 조직 배양검사를 먼저 시행한 이후에 경험적 항균제를 투여해야 하며, 그람염색, 배양 결과를 확인하기 전 항균제 선택은 지역사회역학적 요소와 감염장소(원내 또는 지역사회), 환자의 전신상태, 발병 원인 등을 고려해 결정해야 한다. 치료 항균제는 그람염색, 배양된 원인균주, 항균제 감수성 결과와 항생제의 골조직 투과도, 안전성 등을 고려하여 결정해야 한다(AII).

## 2. 경험적 항균제 치료

- 1) 지역사회획득 감염 시에는 가장 흔한 MSSA 골수염을 고려하여 nafcillin 또는 1세대 cephalosporin 계열의 cefazolin을 투여해야 한다(AI).
- 2) 지역사회획득 골수염에서 균배양 결과 확인 전 그람음성균 감염을 배제할 수 없는 경우에는 nafcillin 또는 cefazolin과 ceftriaxone의 병합요법을 고려할 수 있다(CIII).
- 3) 의료관련감염 또는 원내감염에 의하여 발생하는 골수염, 초기/후기인공삽입물 관련 감염의 경우 및 항포도알균항생제에 반응이 없을 때에는 MRSA 감염 가능성을 고려하여 vancomycin 또는 teicoplanin 투여를 고려할 수 있다(CIII).

## 3. 선택적 항생제 치료

- 1) MSSA 골수염에 대한 선택적 치료항생제로는 *S. aureus*에 항균력이 있는 nafcillin 또는 1세대 cephalosporin 계열의 cefazolin을 투여해야 한다(AI).
- 2) MSSA 골수염에서 vancomycin 치료는 재발률이 높아 사용을 지양해야 한다(AII).
- 3) MRSA 골수염의 1차 치료제로 vancomycin을 권고한다(BII). Teicoplanin 또한 MRSA 골수염의 초기 치료제로 고려할 수 있다(BII).
- 4) MRSA 골수염의 치료 시 vancomycin 최저 혈중 농도를 15-20 ug/mL로 유지한다(BIII).

## 4. 항균제 병합요법과 경구전환요법

- 1) 일반적인 골수염의 치료에 rifampin 초기 병합요법은 권하지 않는다(CIII).
- 2) *S. aureus* 감염증의 경우 경구 'step-down' 치료 시 감수성 검사 결과에 따라서 rifampin-ciprofloxacin, rifampin-levofloxacin, rifampin-trimethoprim/sulfamethoxazole의 병합요법을 사용한다(BII).
- 3) 골수염 치료를 위해 cefadroxil, cephalixin, cefradine 등의 1세대 cephalosporin 계열 경구 항생제는 사용하지 않는다(CIII).
- 4) 녹농균에 의한 골수염 치료 시 quinolone은 세균의 양이 많은 초기 상황에서 내성을 쉽게 유발할 수 있으므로,  $\beta$ -lactam 계열 항생제와 aminoglycoside 계열 항생제를 초기 병합치료 이후에 사용할 수 있다(BIII).

**Table 6.** Suggested regimens for antimicrobial therapy of osteomyelitis

|                              | Organism                                                                                      | Preferred                                                                                                                                                                    | Alternative                                                                                                                                                                                                                                                         |
|------------------------------|-----------------------------------------------------------------------------------------------|------------------------------------------------------------------------------------------------------------------------------------------------------------------------------|---------------------------------------------------------------------------------------------------------------------------------------------------------------------------------------------------------------------------------------------------------------------|
| Empirical antibiotic therapy | Community onset                                                                               | 2.0 g nafcillin <sup>a</sup> every 4 hours or 2.0 g cefazolin every 8 hours (+ <sup>b</sup> /-) 2.0 g ceftriaxone every 24 hours                                             |                                                                                                                                                                                                                                                                     |
|                              | Nosocomial or healthcare-associated                                                           | 1.0 g vancomycin <sup>c</sup> every 12 hours or 400 mg teicoplanin every 24 hours (First day every 12 hours) (+ <sup>b</sup> /-) 2.0 g ceftazidime or cefepime every 8 hours |                                                                                                                                                                                                                                                                     |
| Selective antibiotic therapy | Methicillin susceptible <i>Staphylococcus aureus</i> or Coagulase-negative staphylococci      | 2.0 g nafcillin every 4 hours or 2.0 g cefazolin every 8 hours → step-down oral agents <sup>d</sup>                                                                          | 3.0 g ampicillin/sulbactam every 6 hours or 2.0 g ceftriaxone every 24 hours or 600 mg clindamycin every 8 hours or 1.0 g vancomycin every 12 hours → step-down oral agents <sup>d</sup>                                                                            |
|                              | Methicillin resistant <i>Staphylococcus aureus</i> or Coagulase-negative staphylococci        | 1.0 g vancomycin <sup>c</sup> every 12 hours or 400 mg teicoplanin every 24 hours (First day every 12 hours)                                                                 | 600 mg linezolid every 12 hours or 7.5 mg/kg quinupristin-dalfopristin every 8 hours or 600 mg clindamycin every 8 hours or ≥ 6.0 mg/kg <sup>1</sup> /day <sup>1</sup> daptomycin or quinolone + 600 mg rifampin or trimethoprim/sulfamethoxazole + 600 mg rifampin |
|                              | <i>Streptococcus</i> spp.                                                                     | 3–4 million units penicillin G every 4–6 hours                                                                                                                               | 2.0 g ceftriaxone every 24 hours                                                                                                                                                                                                                                    |
|                              | Enterobacteriaceae, quinolone-susceptible, non-extended-spectrum β-lactamase (ESBL)-producing | 500–750 mg ciprofloxacin every 12 hours                                                                                                                                      | 2.0 g ceftriaxone every 24 hours                                                                                                                                                                                                                                    |
|                              | Enterobacteriaceae, quinolone-resistant, non-ESBL-producing                                   | 2.0 g ceftriaxone every 24 hours                                                                                                                                             |                                                                                                                                                                                                                                                                     |
|                              | Enterobacteriaceae, ESBL producer                                                             | 1.0 g ertapenem every 24 hours or 500 mg imipenem every 6 hours or 1.0–2.0 g meropenem every 8 hours                                                                         |                                                                                                                                                                                                                                                                     |
|                              | <i>Pseudomonas aeruginosa</i>                                                                 | 2.0 g ceftazidime or cefepime every 8 hours (+/-) (combined with aminoglycoside for 2–4 weeks) → followed by 750 mg oral ciprofloxacin <sup>e</sup> every 12 hours           | 4.5 g piperacillin/tazobactam every 8 hours (+/-) (combined with aminoglycoside for 2–4 weeks) or 500 mg imipenem every 6 hours or 1.0–2.0 g meropenem every 8 hours → followed by 750 mg oral ciprofloxacin every 12 hours                                         |
|                              | Mixed anaerobes                                                                               | 3.0 g ampicillin/sulbactam every 6–8 hours 1.2 g amoxicillin/clavulanate every 6–8 hours 4.5 g piperacillin/tazobactam every 8 hours                                         | +500 mg metronidazole every 8 hours +600 mg clindamycin every 8 hours or 500 mg imipenem every 6 hours or 1.0–2.0 g meropenem every 8 hours                                                                                                                         |

<sup>a</sup>In patients with delayed hypersensitivity to nafcillin, cefazolin can be used. In patients with immediate hypersensitivity, penicillins should be replaced by vancomycin or clindamycin. *S. aureus* isolates that are clindamycin-susceptible but erythromycin-resistant should be tested for inducible clindamycin resistance using the D-test.

<sup>b</sup>Combination therapy can be considered before the causative organism is identified in some conditions, *i.e.*, preceding bacteremia when associated with urinary tract infection or intra-abdominal infection, or in the immunocompromised or elderly.

<sup>c</sup>The trough concentration of vancomycin should be 15–20 µg/mL.

<sup>d</sup>Combination therapy with drugs to which the organism is susceptible should be used for the treatment of osteomyelitis caused by *S. aureus*.

500–750 mg ciprofloxacin every 12 hours + 600 mg rifampin every 24 hours/ 750 mg levofloxacin + 600 mg rifampin every 24 hours/ trimethoprim/sulfamethoxazole 80/400 mg single strength, 2 tablets every 12 hours + 600 mg rifampin every 24 hours.

<sup>e</sup>Quinolone monotherapy is no longer considered adequate because of the high risk for the emergence of resistance during the high bacterial burden that exists in the initial stages of the disease; however, it can be used as an oral step down therapy after initial combination therapy with β-lactam agent and aminoglycoside.

경험적 항균제는 지역사회의 역학적 요소와 감염장소(원내 또는 지역사회), 환자의 전신상태, 발병 원인 등을 고려해 선택해야 한다(AII). 원인 균주가 동정되면 원인균의 항균제 감수성결과에 따라 적절한 항균제를 선택하되, 원칙적으로 골조직이나 디스크로 잘 투과되고, 이상반응이 적은 항균제를 사용해야 한다(AI). 골조직 내 항생제 투과도는 fluoroquinolone, clindamycin, rifampicin, fusidic acid, metronidazole 등이 가장 높고  $\beta$ -lactam 계열 항생제와 glycopeptide 계열 항생제가 두번째이며, aminoglycoside 계열 항생제가 가장 낮다. 그러나 급성 염증이 있는 조직에서는 항생제 투과도가 증가하기 때문에 골수염의 치료에 있어 항균제 골투과도의 상대적 중요성은 아직 불명확하다[31, 32]. 항균제의 디스크 조직 내로의 투과는 충분히 연구되어 있지 않다[31].

#### ① 골수염의 경험적 항균제 치료

지역사회획득 골수염인 경우 배양검사 결과가 나오기 전까지는 일반적으로 MSSA 골수염 가능성을 고려하여 *S. aureus*에 항균력이 있는 penicillin계열의 nafcillin 또는 1세대 cephalosporin 계열의 cefazolin을 경험적 항균제로 권고한다(AI) [28, 31, 33-36]. 요로감염이나 복강내 감염에 동반된 균혈증이 선행한 경우 또는 면역저하자나 노인에서 발생한 불명확한 원인의 골수염에 대해서는 *S. aureus*뿐만 아니라 *E. coli* 등의 그람음성균에 대한 고려가 필요하므로 nafcillin 또는 cefazolin과 ceftriaxone의 병합 요법을 경험적으로 시행할 수 있다(CIII). 골수염의 원인균 및 내성 역학에 따라서 일부 지침에서는 nafcillin 또는 cefazolin과 ciprofloxacin의 병합요법[28], ciprofloxacin과 clindamycin의 병합요법을 권고하기도 한다[33]. 국내 2004년 발표된 1999-2001년 8개 대학병원 *Staphylococcus*의 감수성 발표 자료에 의하면 243개 MSSA 주의 clindamycin 내성율은 12%, clindamycin 감수성이나 erythromycin 내성인 경우는 28% 였고, rifampin 내성 0.8, TMP-SMX내성 1.2%였다[37]. 국내 24개 병원에서 수집된 모든 임상 검체에서의 *Staphylococcus aureus*의 항생제 감수성 보고에서 MRSA가 69% 분리되었으며 ciprofloxacin내성율 57%, clindamycin 내성율 60%, erythromycin 내성율 67%, TMP-SMX 내성율 4%로 보고하였다[38]. 또한, 지역사회 요로감염증의 주된 원인균인 *E. coli*의 ciprofloxacin내성율이 24.8%임을 고려할 때 ciprofloxacin, clindamycin을 경험적으로 사용하기에 무리가 있겠다[39].

의료관련감염, 조기/후기인공삽입물 관련 감염, 항포도알균 항생제(nafcillin, cefazolin 등)에 반응이 없는 골수염에서는 MRSA 감염 가능성을 고려하여 vancomycin 또는 teicoplanin 투여를 고려한다(CIII).

#### ② *S. aureus* 골수염의 선택적 항균제 치료

*S. aureus*가 원인 균주로 확인되었다면 항균제 감수성결과에 따라 치료 항균제를 선택한다. MSSA 골수염에 대해서는 1차 항포도알균 항균제(nafcillin, cefazolin 등)가 추천된다(AI) [34-36, 40, 41]. 제한된 임상자료에도 불구하고 이미 발표된 진료지침들에서는 MSSA 골수염에 대하여 cefazolin 치료를 권고하고 있으며, Zeller 등은 100명의 환자를 2년 추적 조사한 후향적 분석을 통해 93% 완치율을 보고하여 cefazolin 정주치료의 유용성을 증명하였다(BII) [40, 41]. 반면, Lazza-

rini 등은 메타분석을 통해 골수염에서의 다양한 cephalosporin 계열 항생제의 효과에 대해 비교하였으나 특정 항생제의 상대적 우월성은 증명하지 못하였다[42].

Aminopenicillin과  $\beta$ -lactam 억제제의 복합제인 ampicillin/sulbactam, amoxicillin/clavulanate도 MSSA 골수염의 선택적 치료 항균제로 고려할 수 있다(BII). 중증 연부조직 또는 골관절 감염을 대상으로 한 무작위 비교연구에서 ampicillin/sulbactam은 cefotaxime과 비등한 치료 성적을 보였다[42]. Amoxicillin/clavulanate 역시 동물모델연구에서 flucloxacillin, clindamycin 병합과 비슷한 효과를 보였으며 Monte Carlo simulation에서 우수한 골투과를 보였다[44, 45].

MSSA 골수염에서 ceftriaxone투여군은 cefazolin투여군과 치료 결과가 비슷하였던 반면 vancomycin투여군에서는 재발 위험이 2.8배 높았던 연구결과를 근거로 MSSA 골수염에서는 vancomycin의 사용은 지양해야 한다(AII)[46, 47].

Clindamycin은 *S. aureus*에 대한 항균력이 우수하며 뼈와 관절액 농도가 높아 소아 골수염에 서는 표준 치료제로 사용되나 성인에 대한 자료는 불충분하다(CIII)[48, 49]. 단, clindamycin을 치료제로 사용할 경우에는 D-test를시행하여 유도내성 여부를 확인하고 유도내성이 확인되지 않을 경우에만 사용해야 한다(AII).

Ceftriaxone은 MSSA에 대해서는 1차 항포도알균 항균제(nafcillin, cefazolin 등)에 비해 항균력이 상대적으로 낮지만 하루 1회 투여의 장점으로 골수염의 외래 정주 치료제로서 장점을 지닌다(BII). Cefazolin 또는 nafcillin으로 2주 입원 치료 이후 외래에서 ceftriaxone 2.0g 정주 치료시 6개월 추적 시점에서 치료효과가 만족할 만하다는 연구결과가 보고된 바 있다[50]. 골수염의 재발에 있어서도 ceftriaxone투여군과 cefazolin투여군 간 차이가 없었다[47].

Quinolone을 *S. aureus* 골수염의 치료제로 사용할 수는 있으나 단독 사용시 쉽게 내성 균주가 선택되어 재발과 치료 실패의 가능성이 있으므로 주의를 요한다. 실제 초기에 quinolone에 감수성을 보인 경우라도 ciprofloxacin을 3개월 투여한 후 추적해보면 MRSA의 79%, MSSA의 13.6%가 ciprofloxacin에 고도내성을 획득하였다는 보고가 있다[51]. quinolone 단독요법의 치료효과는  $\beta$ -lactam과 비슷하다고 보고되고 있으나 연구에 포함된 환자들에서 분리된 원인균의 대부분이 녹농균을 포함한 그람음성균으로 해석에 주의를 요한다[42, 52]. 최근 분석에 따르면 골수염에서 quinolone의 임상적 치료 성공율은 60-80%로 보고되고 있다. 그러나 quinolone 단독 치료의 치료 성공율이 피사조직 제거술과 비슷하였으나, 이에 따른 구분이 없었고, 많은 연구들에서 고용량의 quinolone (ciprofloxacin 750 mg BID)이 사용되었음을 고려할 때 단독 치료 및 그 적정용량에 대해서는 결론을 내리기 어렵다[53].

MRSA 골수염의 치료제로는 1차 치료제로 vancomycin, teicoplanin을 권고한다. 1차 치료제를 사용할 수 없는 경우 linezolid, quinupristin/dalfopristin, tigecycline을 고려할 수 있다. 그 외 감수성이 있는 경우 trimethoprim/sulfamethoxazole과 rifampin 병합요법, quinolone과 rifampin 병합요법, clindamycin, 추후 국내에서 사용될

daptomycin의 사용도 고려할 수 있다.

Vancomycin은 동물실험에서 골투과도가 낮고, 치료실패율도 46%까지 높게 보고되고 있음에도 불구하고 여러 진료지침에서 MRSA 골수염의 1차치료제로 권고하고 있으며(BII)[54], 괴사조직제거술을 병행한 경우 더욱 효과적이었다(BII)[55]. 2010년 미국감염학회(Infectious Diseases Society of America, IDSA) MRSA 진료지침에서는 *S. aureus*에 의한 심내막염, 폐렴, 중추신경계감염, 괴사근막염과 함께 골수염을 중증 감염증으로 분류하고 MRSA 골수염 치료 시 vancomycin 최저농도를 15-20 ug/mL로 유지하도록 권고하였다(BIII)[56]. Teicoplanin 역시 MRSA 골수염에 대해 87-90%의 치유율을 보여 초기치료제로 고려할 수 있다(BII)[57]. Teicoplanin은 vancomycin에 비해서 red man syndrome (목 주위 및 얼굴의 피부 과민반응) 등의 이상반응이 적고 순응도가 좋으며 외래에서 정주/근주치료가 가능한 장점이 있다. 최근 소수의 환자를 대상으로 MRSA 골수염 항생제 치료효과 연구에 의하면 임상적 치료 성공률이 각각 teicoplanin은 83%, linezolid는 77%, daptomycin은 92%에 달했다[58]. 특히 daptomycin은 고용량(6 mg/kg/일 이상) 투여 시, 90%에 달하는 임상경과의 호전을 보였고 vancomycin 등 1차 치료제 실패 환자에서도 치료성적이 우수하였다[59]. 단, 2013년 현재 국내에서는 시판되어 있지 않으며 비감수성균주 감염의 치료실패 증례보고가 있으므로 향후 사용하더라도 감수성검사를 반드시 확인하여야 한다[59-63]. Linezolid는 골투과도가 높고 경구생체이용률이 높아서 MRSA 골수염의 경구치료에 효과적이다(BII). 실제 Linezolid는 골수염환자의 55-98%에서 임상적 치료성공을 보였다[64, 65]. 그러나 2주 이상 투여 시 가역적인 골수억제를 통해 혈소판 감소증과 빈혈이 발생하고 장기간 투여 시에는 비가역적인 말초신경병증, 시신경염이 발생할 수 있으므로 2주이상 투여 시 적어도 주 1회 일반혈액검사를 시행해야 하고, 1개월 이상 사용 시 시신경염의 가능성에 대하여 안과검진을 받도록 권한다[64-68]. Linezolid를 사용하고자 하는 경우 우리나라에서는 보험인정 가능성 여부에 대한 고려가 반드시 필요하겠다. Quinupristin/dalfopristin은 1차 치료에 실패한 40명의 MRSA 골수염과 관절염 환자에서 78%의 치료 성공율을 보여 2차 치료제로 고려할 수 있다(CII)[69]. Tigecycline은 MRSA 동물모델연구에서 rifampin과의 병용 시 vancomycin-rifampin 병용요법과 비슷한 효과를 보였고, 우수한 골투과율을 보였다[70]. 그러나 현재까지 골수염 환자에 대한 임상 연구 결과는 없는 상황으로 향후 연구 결과의 확인이 필요하다.

### ③ *S. aureus* 골수염의 항균제 초기병합요법

골수염의 치료 성공률을 높이기 위해 항균제 병합요법이 연구되어 왔다. MSSA 골수염에 비하여 일반적으로 MRSA 골수염의 치료성적이 나쁘지만 rifampin을 포함한 병합요법을 하면 치료성공률을 높일 수 있다고 알려져 있다. 그러나 인공관절과 무관한 MSSA 골수염의 경우는  $\beta$ -lactam 단독요법과 비교해 통계적으로 유의한 치료 성공률의 차이를 보이지 않아 rifampin의 초기 병합요법을 권할 수 있는 근거는 부족하다(CII) [33, 63, 71, 72]. Norden 등은 nafcillin 단독치료 군과 nafcillin-rifampin 병합치료 군을 2-4년 간 추적하여 임상적 치료반

응을 비교하였을 때, nafcillin 단독치료군(40%)에 비해 병합치료군(80%)에서 치료효과가 높았으나 통계적 유의성은 없었다[34]. Oxacillin 또는 vancomycin 단독치료 군과 rifampin 병합치료군의 치료효과를 비교한 연구에서도 단독치료 군(62%)에 비해 병합치료 군(90%)에서 치료성공률이 높았으나 통계적으로 유의한 차이는 없었다[72].

### ④ *S. aureus* 골수염의 항균제 경구요법

골수염 환자의 'step-down' 경구전환요법으로, 4주 미만의 정주치료 후 경구전환 치료를 시행한 군과 정주 항균제 치료를 유지한 군을 비교한 자료에서 양 군 간 치료 성공률에 유의한 차이가 없었다는 보고가 있다(78% 대 69%,  $P=0.59$ )[73].

경구 치료제로서 rifampin-ciprofloxacin 병합요법은 *S. aureus* 인공관절 감염치료에 유일하게 무작위 비교임상시험으로 효과가 증명되었으나 일반 골수염 치료에 대한 임상자료는 아직 부족하다[74]. *S. aureus* 화농성 척추염에서, *S. aureus*가 levofloxacin에 감수성인 경우 rifampin-levofloxacin 병합요법의 치료성공률은 96.3%에 달하였다[75].

Trimethoprim/sulfamethoxazole (TMP/SMX)도 *S. aureus*에 의한 골수염, 관절염의 치료에 오랫동안 사용되어 왔다. Sanchez 등은 수술 후 발생한 골수염에서 수술적 치료와 함께 고용량 TMP/SMX-rifampin 병합요법으로 높은 치료성공률을 보였다고 보고하였다[74]. 따라서 *S. aureus* 골수염의 경우 'step-down' 치료 시 감수성 검사 결과에 따라서 rifampin-ciprofloxacin, rifampin-levofloxacin, rifampin-TMP/SMX의 병합요법을 사용할 수 있다(BII). 단, rifampin-TMP/SMX 병합요법 시에는 괴사조직이 충분히 제거되지 않은 경우 괴사조직내 TMP/SMX의 효과가 떨어져 상승 효과를 얻을 수 없고 그 결과 rifampin 내성출현을 억제하지 못하므로 주의를 요한다(BIII)[76, 77]. Nguyen 등은 fluoroquinolone, macrolide,  $\beta$ -lactam 등 항균제 내성균에 의한 골관절 감염증에 대하여 rifampin-linezolid 또는 rifampin-TMP/SMX로 치료하여 각각 89.3%와 78.6%의 치료효과가 있었음을 보고하였다[78]. Fusidic acid도 MRSA 골관절 감염 치료 시 초기 vancomycin 투여 이후 rifampin과 병합한 경구요법제제로 사용할 수 있다[79]. 그러나, 최근 *S. aureus*의 fusidic acid에 대한 내성증가 보고가 있으므로 분리된 *S. aureus*의 감수성 결과를 근거로 사용 여부를 고려하여야 한다[80-82].

소아와 성인에서 발생한 골수염을 cefadroxil, cephalexin, cefradine 등의 1세대 cephalosporin 계열 경구 항생제로 치료한 증례보고는 있으나, 이들 경구 항생제는 투여 시 혈중 농도가 10% 미만으로서 충분한 골농도 유지에는 부족하며, 이를 사용한 신뢰할만한 임상연구가 없어 권고하기 어렵다(CIII)[32].

인공삽입물(external fixation, intramedullary nailing, plate, screw 등)이 있는 골수염 환자에서는 인공관절감염과 동일하게 rifampin을 포함한 병합요법을 시행해야 한다(AII). Pavoni 등은 인공삽입물과 관련된 골수염 환자 20명을 초기 정맥주사로 teicoplanin과 ciprofloxacin (또는 rifampin)을 투여한 후 경구 ciprofloxacin-rifampin으로 바꾸어 평균 27.7주를 치료했을 때, 100% 치유율을 보고하였다[83]. 인공관절

관련감염은 추후 별도의 진료지침에서 자세히 다루기로 한다.

#### ⑤ 그람음성 및 혼합균주 골수염의 선택적 항균제 치료

그람음성균 골수염의 치료는 균주의 종류와 그 항균제 감수성에 따라 결정되지만 대규모 연구는 없이 권고되고 있다[3, 31, 33, 36]. 녹농균의 경우, 균혈증과 폐렴의 치료에서는 항생제 병합요법이 권고되고 있으나 골수염에서의 상대적 이득은 아직 불분명하며 초기 사용 항균제의 선택이나 수술적 치료의 정도에 따라 병합 요법을 고려하여야 한다. 녹농균을 포함한 그람음성균에 의한 골수염 치료에 관한 연구들에서 고용량의 quinolone (ciprofloxacin 750 mg bid), 12-16 주의 장기간 투여로 임상적 치료 성공률은 60-80%에 달하였음을 보고하였다[32]. Quinolone은 세균의 양이 많은 초기 상황에서 내성이 유발될 수 있으므로 녹농균에 의한 골수염 치료시  $\beta$ -lactam과 aminoglycoside 초기 병합치료 이후에 사용할 수 있다(BIII)[36].

대부분의 당뇨족 감염과 허혈성 궤양과 동반된 골수염의 치료는 호기성 및 혐기성 혼합균주를 모두 고려한 치료가 필요하다.

지금까지 발표된 연구 결과들을 근거로 권고할 수 있는 골수염 치료의 항생제는 다음과 같다(Table 6).

#### (3) 골수염의 보조적 치료 요법

전신적 항균제의 보조요법으로 국소적 항균제 치료를 만성 골수염의 치료에 사용할 수 있다(BII).

만성 골수염에서 병변의 산소 농도가 떨어지면 탐식작용과 백혈구의 살균효과가 떨어지고 콜라겐 생성과 골 생성, 혈관 생성에 장애를 주므로 고농도 산소 치료가 제안된다[84]. 28명의 만성 골수염 환자에 대해 시행된 연구에서 임상반응이나, 재발에 유의한 차이를 보이지 못하였으나, 보조 치료제로서의 치료 성공 증례 보고들이 있다[85]. 따라서 통상적인 치료에 반응이 없는 불응성 골수염 (refractory osteomyelitis)에 대해서 수술, 항균제 치료와 함께 보조적으로 사용을 고려할 수 있다(CIII).

전신적 항균제의 보조요법으로 국소적 항생제 요법은 인공관절감염의 예방에 도움이 된다는 것이 알려져 있어, 인공관절 감염증의 치료, 개방골절, 만성 골수염의 치료에 이용할 수 있다(BII). 인공관절 감염증 및 만성 골수염에서는 골의 해부학적 특성상 혈액 공급이 원활하지 않으며 골절과 감염에 의한 조직 파괴, 사골과 반복된 수술로 인한 연부 조직손상 등으로 전신 투여한 항생제만으로는 감염의 치유가 어렵다. 정형외과 영역에서 많이 사용되는 항균제 함유 골시멘트는 골관절의 감염 예방과 치료에 우수하며, 이는 국소적으로 장기간 항균제의 농도가 유지됨에 기인한다. 항생제의 국소 농도는 함유된 항균제의 양, 표면적의 넓이 및 시멘트의 다공성에 비례한다. Klemm 등은 gentamicin 함유 구슬(bead)을 사용한 128명의 환자를 대상으로 한 연구에서 91.4%의 높은 치료 성공률을 보고하였다[86]. Simplex P (1.0 g의 tobramycin 포함, Stryker Howmedica Osteonics, Mahwah, NJ, USA), Palacos G (0.85 g의 gentamicin 포함, Zimmer, Warsaw, IN, USA), SmartSet GHV와 SmartSetMHV (1.0 g의 gentamicin 포함,

Depuy Orthopaedics, Warsaw, IN, USA) 등의 골시멘트(polymethyl-metacrylat, PMMA)가 미국 FDA의 승인을 받아 사용되고 있으며, 유럽에서는 Septopal (Biomet Merck, Dordrecht, The Netherlands)이 사용되고 있다.

#### (4) 척추 골수염의 치료

1. 척추 골수염은 대부분 단일 균에 의한 급성 혈행성 감염으로 발생하며 적절한 항균제를 선택하여 치료해야 한다(AII)
2. 수술의 적응증은 세균학적, 조직학적 확진을 얻기 위한 경우, 신경 압박에 의한 마비의 소견이 있는 경우, 과도한 골파괴로 인한 불안정이 발생하거나 예상되는 경우, 심한 척추 후만증 등 기형이 동반되거나 예방이 필요한 경우, 임상적으로 중요한 농양이 형성된 경우, 불응성 통증이 있어도 수술을 고려할 수 있다(BIII). 경막외 농양에 의한 신경압박은 수술적 응급 상황으로서 마비가 발생하고 24-36시간이 지나기 전에 수술해야 한다(AI).
3. 항균제 치료 기간은 일반적으로 6-12주를 권고하나, 치료 기간은 환자의 임상적 치료반응, 임상 경과, 원인균의 항균제 감수성, 인공 보형물 존재 유무 등에 따라 개별화되어야 한다(BIII).

척추 골수염(감염성 척추염, 감염성 척추디스크염)의 치료 목적은 감염된 균을 박멸시키고, 감염된 척추의 기능과 구조를 재건 또는 보존하며 통증을 완화시키는 것이다. 수술 및 항균제 치료와 함께 물리 치료와 바깥고정 등을 보조적으로 병행하는데, 석고붕대나 보조기로 바깥 고정하는 방법은 통증이 심하거나 척추 구조가 안정하지 않을 때 필요하다[87]. 척추 골수염은 대부분 단일 균에 의한 급성 혈행성 감염으로 적절한 항균제 치료가 중요하다.(AII). 예전에는 수술을 통해 시행하던 조직 채취와 배농이 최근에는 CT 유도하 세침흡입 또는 배농의 형태로 시행되고 있어 과거보다 수술을 필요로 하는 경우는 그 수가 감소하였다.

수술의 적응증은 세균학적, 조직학적 확진을 얻기 위한 경우, 신경 압박에 의한 마비의 소견이 있는 경우, 과도한 골파괴로 인한 불안정이 발생하거나 예상되는 경우, 심한 척추 후만증 등 기형이 동반되거나 예방이 필요한 경우, 임상적으로 중요한 농양이 형성된 경우, 항균제 치료에 실패한 경우 등이며, 일부 전문가들은 불응성 통증이 있을 경우라도 수술 대상에 포함시킨다(BIII) [88, 89]. 신경학적인 손상이 없는 경막외 농양 환자는 원인균이 동정된 경우라면 수술적 치료 없이 경과 관찰한다(BIII) [88-90]. 단, 신경학적 이상 여부에 대한 주의 깊은 관찰을 해야 한다. 반면에 신경압박이 동반된 경우는 수술적 응급 상황이므로 마비가 발생하고 24-36시간 이내에 수술을 시행하여야 한다(AI) [88, 89].

인공보형물 삽입 부위의 척추 골수염의 경우는 대부분 수술이 필요하다. 수술 30일 이상 경과 후에 발생한 후기발생 척추인공보형물 관련 척추염에서는 인공보형물(내고정물)의 제거(위험율 0.3)가 유의한 치료성공 인자였다[91]. 그러나 내고정물의 제거 여부는 항생제

치료 반응 정도와 내고정물 제거 후 불안정성 악화에 따른 장기적인 예후 등을 고려하여 개별화하여 결정하여야 한다. 항생제는 반드시 혈액배양 이후에 투여해야 한다. 항생제의 사용이 배양양성률을 낮추므로, 가능하다면 반드시 조직검사 및 조직배양, 농양액 배양을 시행한 후 경험적 항생제를 투여해야 한다(BII).

항균제 치료의 최적 기간에 대한 무작위대조시험 연구는 없으나 대부분의 임상 관찰 연구들은 일반적으로 6-15주의 총 치료 기간, 3-8주의 정주치료 기간을 제시하고 있으며 이를 종합할 때 6-12주를 권고할 수 있다(BIII)[31, 33, 36, 89]. 그러나 환자의 임상적 치료반응, 급만성 경과, 균주의 항균제 내성여부, 인공 보형물 존재 유무 등에 따른 항균제 투여 기간의 조절이 필요하다[31, 33, 36, 89].

#### 6) 치료반응 평가(추적조사)

골수염의 치료 시작 후 ESR, CRP 등 염증 표지자를 주기적으로 검사하여 치료반응을 평가해야 한다(AIII).

골수염의 치료 시작 후 ESR, CRP 등 염증 표지자를 주기적으로 검

**Table 7.** Groups at high risk for septic arthritis

|                                                                                   |
|-----------------------------------------------------------------------------------|
| People with joint diseases, such as rheumatic arthritis or degenerative arthritis |
| Undergone arthroplasty                                                            |
| Low social and economic status                                                    |
| Drug abuser                                                                       |
| Alcoholism                                                                        |
| Diabetes mellitus patients                                                        |
| People who have injected medications or received acupuncture in their joints      |
| Skin ulcers                                                                       |
| Over the age of 80 years                                                          |
| HIV patients                                                                      |

**Table 8.** Causative pathogens of septic arthritis

|                                     |
|-------------------------------------|
| Gram-positive aerobes               |
| <i>Staphylococcus aureus</i>        |
| Streptococci other than pneumococci |
| <i>Streptococcus pneumoniae</i>     |
| Gram-negative bacilli               |
| <i>Haemophilus influenzae</i>       |
| <i>Escherichia coli</i>             |
| <i>Klebsiella pneumoniae</i>        |
| <i>Neisseria gonorrhoeae</i>        |
| <i>Neisseria meningitidis</i>       |
| <i>Mycobacterium</i> spp.           |
| Fungi                               |
| Anaerobes                           |

사하여 치료반응을 평가해야 한다(AIII). ESR, CRP, 백혈구 수는 적절한 치료 후 감소하지만 괴사조직제거술 등 수술적 처치 전후에는 일시적 상승을 보인다. ESR, CRP 혈중 농도의 정상화는 좋은 예후를 반영하는 것으로 치료 종료 시점에도 높게 유지된다면 약물, 감기, 임신 등 다른 요인의 영향을 배제해야 하고, 영상의학검사를 시행해 병변의 상태를 평가할 필요가 있다. 척추 골수염 환자 44명을 대상으로 한 후향적 연구결과에 따르면 치료 1개월째 ESR이 50%이상 감소하지 않는 경우 치료 실패의 가능성이 높았다[92]. 골수염의 치료 중에는 환자의 증상과 징후에 대한 세심한 관찰과 추적검사가 필요하며, 치료 종료 후에는 환자의 치료반응과 건강상태에 따라서 추적조사 간격과 기간을 결정해야 한다. 적절한 추적검사 주기와 치료 종료 후 관찰기간에 대한 논의가 필요하다.

## 2. 화농성 관절염

화농성 관절염은 관절을 침범하는 가장 대표적인 감염성 질환이지만 질환의 특성상 대개의 연구들이 후향적 연구이거나 원인균이 증명된 환례 보고를 중심으로 이루어지고 있어서 명확한 진료 지침을 만들기 어려운 질환이다[93, 94]. 그러나 관절의 통증, 발적, 부종을 증상으로 내원하는 다양한 질환의 환자들에서 화농성 관절염을 감별 진단하여 적절한 치료를 하는 것은 임상에게 매우 중요한 문제이기도 하다.

### 1) 역학

화농성 관절염의 고위험군은 류마티스관절염이나 퇴행성 관절염을 이미 앓고 있는 사람, 인공관절치환술을 받은 사람, 사회 경제적 수준이 낮은 사람, 주사용 마약 사용자, 알콜중독자, 당뇨병자, 관절부위 주사나 침을 맞은 사람, 피부에 궤양이 있는 사람, 80세 이상의 노인, HIV 감염인 등이다[95-102]. 국내 자료가 충분하지는 않지만 일개 후향적 연구에서 관절내 주사나 관절 부위 침 시술 등에 의한 감염이 약 50%라는 보고가 있다(Table 7) [101].

의료관련시설거주 환자, 카테터 삽입 환자, 족부궤양이 있는 환자, 주사용 마약 사용자, 최근 정형외과 처치를 받은 환자는 MRSA에 의한 감염 가능성을 고려해야 한다[103]. 최근에 미국과 유럽을 중심으로 전통적인 원내감염의 위험인자가 없는 지역사회연관 MRSA (Community-associated MRSA, CA-MRSA) 감염이 점차 증가하고 있다[104, 105]. 국내의 CA-MRSA에 대한 다기관 연구에서 한 증례를 화농성 관절염으로 보고하였다[106].

### 2) 원인균 분포

가장 흔한 원인균은 *S. aureus*, Streptococci이며 전체 화농성 관절염의 약 60-90%를 차지한다(Table 8)[97, 98, 102, 107, 108]. 국내의 후향적 연구에서 무릎의 화농성 관절염 환자 122명 중에서 배양양성이 43명이었으며 *S. aureus*가 25례로 58.1%, streptococci가 2례로 4.7%였다[101]. 국내의 다른 연구에서는 80명의 환자 중에서 20명의 환자에서 배양 양성이었으며 *S. aureus*가 10례로 50%, CoNS가 4례로 20%, streptococci가 4례로 20%였다[109]. 성접촉이 잦은 젊은

성인에서는 gonococci에 의한 관절염이 발생할 수 있으며 외상에 의한 화농성 관절염에서는 혐기성 균에 의한 경우도 있다[95, 110-112]. 노인, 반복적인 요로감염, 최근의 복부수술 병력, 면역저하 등의 위험인자가 있는 경우는 그람음성균에 의한 감염 가능성을 고려해야 한다[92, 102, 113]. 치료 항균제 선택과 기간 설정이 어려운 배양 음성 화농성 관절염은 연구마다 4.5-64%로 다양하게 보고되었다[101, 114].

### 3) 임상소견

화농성 관절염은 관절부위열감, 압통 및 운동제한과 같은 증상을 특징으로 하며 대개 병원 내원 2주 이내에 시작된 급성 경과를 보인다[97, 110]. 병독성이 낮은 세균이나 결핵성 관절염의 경우는 증상이 서서히 나타날 수 있으며, 인공관절의 감염은 대개 급성으로 증상이 나타나지만, 장기간에 걸쳐 천천히 나타나는 경우도 있다[115]. 화농성 관절염 환자는 열과 같은 전신증상을 동반하지 않는 경우도 있다[97]. 병원 내원 이후 37.5 이상의 발열은 60% 정도에서 보고되었다[95, 97, 98, 116].

화농성 관절염은 주로 큰 관절들을 침범하며 무릎관절이나 엉덩관절이 전체 화농성 관절염의 60%를 차지한다[102]. Shmerling 등과 Jeng 등의 전향적 연구에서 단일 관절의 열감과 압통, 부종을 증상으로 병원에 내원한 환자에서 세균 배양 양성 화농성 관절염으로 최종 확인된 경우는 8-27%로 보고하였다[116, 117]. 대부분 단일 관절을 침범하지만 약 22%에서는 다관절 침범을 하는 것으로 알려져 있는데, 임균이나 수막알균이 원인균인 경우 다관절을 침범하는 경우가 많았다[95, 98].

### 4) 진단

#### 1. 관절액 검사

- 1) 화농성 관절염이 의심될 때는 항균제 투여 전 관절액 흡인검사를 지체없이 시행해야 한다(AII).
- 2) 채취한 관절액은 신속히 그람염색과 배양을 진행해야 하며, 검체의 배양은 액체배지 또는 원심분리 후 평판배지(agar plate)에서 시행해야 한다(AII).
- 3) 화농성 관절염이 의심될 때는 와파린을 복용 중이어도 관절액 흡인검사의 금기는 아니다(BIII).
- 4) 관절액 내 백혈구수 및 백혈구 분화를 확인하여야 한다(AII).
- 5) 원인균 확인을 위하여 핵산증폭검사(PCR)를 고려할 수 있다(CIII).
- 6) 결핵을 배제할 수 없는 경우 결핵균 도말검사, 배양검사, 핵산증폭검사(PCR)를 고려할 수 있다(BIII).
- 7) 진균 감염을 배제할 수 없는 경우 진균 감염에 대한 검사를 시행하여야 한다(BIII).
- 8) 관절액의 결정체(crystal)를 확인하기 위한 편광현미경 검사를 시행해야 하며, 결정 확인을 위한 검체는 상온에서 보관해

야 한다(AII). 단, 관절액 내 결정체가 확인되더라도 화농성 관절염의 진단을 배제할 수는 없다.

#### 2. 혈액검사

- 1) 혈중 요산수치의 상승이 있는 경우에도 화농성 관절염의 가능성을 배제하지는 않는다(AII).
- 2) 항균제 사용 전 혈액배양을 실시한다(AII). 11. 백혈구수를 포함한 혈액검사, ESR, CRP 검사를 시행한다(AII). 단, 백혈구수나 ESR, CRP의 증가가 없다고 해도 화농성 관절염을 배제할 수는 없다.

#### 3. 영상의학검사

- 1) 감염된 관절부위의 단순 방사선 사진은 감염 자체를 진단할 수는 없으나 기초 검사 및 다른 질환의 감별을 위하여 실시할 수 있다(BII).
- 2) MRI는 화농성 관절염 인접 부위의 골수염 및 연부조직 감염의 동반 여부를 확인하는 데 도움이 되며 수술적 처치의 필요를 확인하기 위해 시행할 수 있다(BII).
- 3) 골주사 검사(bone scan)는 화농성 관절염의 진단에 보조적인 수단으로 사용할 수 있다(BIII).

#### 4. 조직검사 및 조직배양

세척술 혹은 소파술 시행 시 조직생검 및 조직배양을 시행하여야 한다(AIII).

화농성 관절염의 고전적인 정의는 Newman이 언급한 ①염증성 관절염이 있는 부위의 관절액 흡인검사서 병원균이 배양된 경우 ②염증성 관절염이 있으면서 혈액 또는 의미 있는 다른 부위에서 병원균이 배양된 경우 ③이미 항균제를 사용하고 있었던 환자에서는 전형적인 염증성 관절염 증상이 있고 관절액 흡인검사서 흔탁한 관절액이 배양된 경우 ④조직에서 전형적인 화농성 관절염을 시사하는 병리소견을 보인 경우 등이다[118]. 그러나 이러한 기준을 충족하지 않는 화농성 관절염 환자가 많기 때문에 환자의 병력, 진찰소견, 경과를 종합한 임상상의 판단이 중요하다.

#### (1) 관절액검사

화농성 관절염이 의심되면 지체 없이 관절액 흡인검사를 시행해야 한다(AII). 관절액 흡인을 통하여 얻은 검체를 이용해 그람염색 및 배양을 실시해야 하며, 검체의 배양은 액체배지 또는 원심분리 후 평판배지(agar plate)에서 해야 한다(AII)[119, 120]. 와파린과 같은 항응고제를 사용하고 있는 환자라도 관절액 흡인검사의 금기는 아니다(BIII). Weston 등의 연구에서 그람염색을 통해 50%에서 균이 확인되었고, 67%에서 배양을 통해 원인균이 동정되었다[102]. 그러나 국내의 한 연구에서는 배양 음성인 경우가 64.8%로 높게 보고되었다[101].

배양 음성인 관절염이 많기 때문에 원인균 확인을 위한 핵산증폭검사(Polymerase chain reacton, PCR)가 시도되고 있으며 원인균 확

인에는 도움이 될 수 있으나 감수성 결과를 확인할 수 없다는 단점이 있다(CIII) [121-123]. 증상 발생기간이 길고, 비전형적인 증상이 있거나 타 부위의 결핵이 진단된 환자에서 발생한 관절염의 경우 및 결핵성 관절염을 배제할 수 없는 경우에는 결핵을 감별하기 위한 항산성 염색, 결핵배양검사, 결핵 핵산증폭검사(PCR)를 고려할 수 있다(BIII) [124]. 진균혈증이 있었거나 진균감염이 의심되는 경우에는 진균 배양을 포함한 검사를 시행해야 한다(BIII).

통풍과 같은 결정성관절염의 감별을 위해 편광 현미경 검사를 시행해야 하며, 관절액 흡입 후 결정 관찰을 위한 검체는 반드시 상온에 보관해야 한다(AII) [119, 120]. 또한, 현미경 관찰을 통해 관절액내 백혈구 수 및 백혈구 분획을 확인해야 한다(AII) [117, 125-127]. 관절액 검사소견의 메타분석 결과에 따르면 백혈구 수  $25,000/\text{mm}^3$  이상을 기준으로 했을 때 민감도 77%, 특이도 73%를 보이며,  $100,000/\text{mm}^3$  이상을 기준으로 하면 특이도가 99%로 증가하지만 민감도가 23%로 낮았다(Table 9) [128]. 백혈구 분획 중 90% 이상 다핵구인 경우 화농성 관절염을 뒷받침하는 소견이다[128]. 그러나, 백혈구 수가  $25,000/\text{mm}^3$  이하이고 다핵구가 90% 이하라고 해도 화농성 관절염을 배제할

수는 없기 때문에 임상적 판단과 그림염색 및 배양결과가 중요하다. 그밖에 관절액 내 젖산(lactic acid), LDH, protein의 증가나 glucose의 감소가 진단적 도움을 줄 수 있으나 화농성 관절염을 확증한 만한 지표로는 아직까지 정립되지 않았다[117, 127].

## (2) 혈액검사

항균제를 투여하기 전에 혈액배양검사를 시행해야 한다(AII) [129]. 한 연구에서는 24%에서 관절액과 혈액에서 동일한 균이 배양되었고 관절액 배양 음성인 환자의 약 9%에서 혈액배양을 통해 원인균이 확인되었다[102]. 혈액내 백혈구 수, ESR, CRP 상승 소견이 없다 해도 화농성 관절염을 배제할 수는 없다. 이들 검사수치는 치료에 대한 반응을 평가하는 데 유용하므로 시행해야 한다(AII) [127]. 최근에는 procalcitonin이 세균성 질환에서 증가한다는 보고가 있어 화농성 관절염 진단에서의 유용성을 평가하는 연구가 진행 중이다[130]. 장기 부전의 정도를 파악하고, 신기능 이상에 따른 항균제 용량 조절을 위해 간기능과 신기능을 포함한 생화학 검사를 시행한다. 혈중 요산 수치는 통풍과 화농성 관절염의 감별에 도움이 되지 않으며 혈중 요산 수치의 상승이 있는 경우에도 화농성 관절염의 가능성을 배제할 수

**Table 9.** Sensitivity and specificity based on the results of white blood cell (WBC) counts and fractions

|                                     | Sensitivity (%) | Specificity (%) | Likelihood ratio (95% CI) |                  |
|-------------------------------------|-----------------|-----------------|---------------------------|------------------|
|                                     |                 |                 | Positive                  | Negative         |
| > 100,000 WBC/ $\text{mm}^3$        | 29              | 99              | 28.0 (12.0–66.0)          | 0.71 (0.64–0.79) |
| > 50,000 WBC/ $\text{mm}^3$         | 62              | 92              | 7.7 (5.7–11.0)            | 0.42 (0.34–0.51) |
| > 25,000 WBC/ $\text{mm}^3$         | 77              | 73              | 2.9 (2.5–3.4)             | 0.32 (0.23–0.43) |
| Polymorphonuclear cells $\geq 90\%$ | 73              | 79              | 3.4 (2.8–4.2)             | 0.34 (0.25–0.47) |

CI, confidence interval.

**Table 10.** Selection of empirical antimicrobial agents for the treatment of septic arthritis according to risk factors

| Risk factors                                                                                                                            | Antibiotics                                                                                                                                                                                                                                                                                                                                                                                                 |
|-----------------------------------------------------------------------------------------------------------------------------------------|-------------------------------------------------------------------------------------------------------------------------------------------------------------------------------------------------------------------------------------------------------------------------------------------------------------------------------------------------------------------------------------------------------------|
| No risk factor                                                                                                                          | 2.0 g cefazolin every 8 hours<br>or 1.0–2.0 g nafcillin every 4 hours<br>or 3.0 g ampicillin/sulbactam every 6 hours<br>*with/without gentamicin (5 mg/kg)<br>*If anaphylactic history with penicillin:<br>1.0 g vancomycin every 12 hours (trough concentration of vancomycin should be 15–20 $\mu\text{g}/\text{mL}$ )<br>or 400 mg teicoplanin every 24 hours (first day 400 mg; every 12-hours loading) |
| High-risk of gram-negative bacteria infection (elderly, recurrent urinary tract infection, recent abdominal surgery, immunocompromised) | 2.0 g ceftriaxone every 24 hours<br>*If allergic to ceftriaxone:<br>750 mg levofloxacin every 24 hours<br>or 400 mg ciprofloxacin every 12 hours                                                                                                                                                                                                                                                            |
| High risk of methicillin resistant <i>staphylococcus aureus</i> (recent admission into a long-term care facility, foot ulcer)           | 1.0 g vancomycin every 12 hours (trough concentration of vancomycin should be 15–20 $\mu\text{g}/\text{mL}$ )<br>or 400 mg teicoplanin every 24 hours (first day 400 mg; every 12-hours loading)                                                                                                                                                                                                            |
| Possible <i>Neisseria gonorrhoeae</i> (young adult, recurrent sexually transmitted infections, recent gonococcal infection)             | 1.0 g ceftriaxone every 24 hours (intravenous or intramuscular route)                                                                                                                                                                                                                                                                                                                                       |

는 없다(AII).

### (3) 영상의학검사

화농성 관절염에서 영상의학 검사의 의미는 제한적이다. 감염된 관절의 단순 방사선 사진을 시행하여 관절염 발생 이전에 다른 질환으로 인한 관절의 변형이나 외상 여부를 확인하는 과정이 필요하다(BII) [131]. CT와 MRI는 염증성 관절염과 퇴행성 관절염의 감별에는 도움이 되지만 화농성 관절염, 류마티스 관절염이나 통풍과 같은 염증성 관절염의 감별에는 그 역할이 제한적이다. 관절 인접 부위의 골수염 동반이 의심되거나 관절 주위 연조직의 농양이 동반된 경우는 MRI 시행이 수술적 처치의 필요성을 확인하는데 도움이 될 수 있다(BII) [131-133]. 3상 골스캔(3 phase bone scan)은 관류기 및 혈액풀 영상에서는 활막(synovium)과 연조직을 따라서 관절주변으로 증강소견을 보이며 지연기에는 뼈 부위에서 약간만 증강되는 소견을 보이지만 다른 염증성 관절염과의 감별은 어렵다(BIII)[13].

### 5) 치료

1. 화농성 관절염이 의심되면 관절액 흡인 검사 및 혈액배양검사 후 다음과 같은 경험적 항균제를 사용하고, 그람염색 결과에 따라서 적절한 항균제로 변경한다(AII).

- 1) 위험인자가 없는 경우 cefazolin이나 ampicillin/sulbactam, nafcillin을 사용한다.
- 2) MRSA의 위험인자가 있는 경우 vancomycin이나 teicoplanin을 사용한다.
- 3) 그람음성균의 위험인자가 있는 경우 ceftriaxone을 사용한다.
- 4) *Neisseria gonorrhoeae*의 위험인자가 있는 경우 ceftriaxone을 사용한다.

2. 경험적 항균제 선택시 살균적항균제를 사용한다(BII).

3. 화농성 관절염이 진단되면 가능한 초기에 배액을 충분히 시행한다.(AII).

4. 감염된 관절은 가능한 초기 관절천자를 실시하고 24-48시간까지 반복적 관절 천자 및 항균제 치료에 반응하지 않는 경우 수술적 치료를 시행한다. 관절천자로 배액이 용이치 않은 경우에는 최대한 초기에 수술적 치료를 시행한다(AIII).

5. 배양된 균주의 항균제 감수성 결과에 맞추어 치료 항균제를 유지 또는 변경해야 한다(AII).

6. 일반적으로 전제 항균제 치료 기간은 4-6주 이상이며, 적어도 초기 2주 이상 주사용 항균제 치료 후 증상이 호전되면 경구 전환을 고려할 수 있다(CIII).

7. 항균제의 종료시기는 관절 증상 및 진찰소견의 호전과 급성 염증 반응을 나타내는 ESR, CRP 등의 검사 결과를 참고하여 결정할 수 있다(CIII).

8. 배양 음성이라도 화농성 관절염이 의심되면 항균제 치료를 유지하여야 하며 관절의 전반적인 호전 양상에 따라 경험적으로 사용한 항균제를 지속 처방하며 관절 증상 및 진찰소견의 호전과 ESR, CRP를 참조하여 치료 종결 여부를 결정할 수 있다(BII).

### (1) 경험적 항균제 치료

특별한 위험인자가 없는 경우, MSSA나 streptococci가 화농성 관절염의 가장 흔한 원인균이므로 경험적 항균제로는 1세대 cephalosporin이나 ampicillin/sulbactam, nafcillin을 사용 할 수 있다(AII). 중증 패혈증을 동반한 경우에는 gentamicin 병용을 고려할 수 있다(Table 10). Penicillin 계열 항균제에 과민반응의 기왕력이 있는 환자는 vancomycin이나 teicoplanin을 사용할 수 있다. Clindamycin도 사용해 볼 수는 있으나 살균 항균제가 아니어서 초기 사용을 권장하지 않는다. 그람양성균에 항균력이 있는 moxifloxacin이나 levofloxacin도 사용할 수 있으나 장기간 사용시 *S. aureus*에서 내성획득이 우려되므로 권장하지 않는다.

MRSA 감염의 위험인자를 가진 환자의 화농성 골수염 치료의 경험적 항균제로는 vancomycin 또는 teicoplanin을 사용한다(AII). vancomycin이나 teicoplanin을 사용할 수 없는 환자에서는 linezolid를 사용할 수 있다[134]. 최근에 소개된 tigecycline이나 daptomycin의 경우 화농성 관절염에서의 효과를 평가한 연구는 아직까지 부족하지만 성공적으로 치료한 증례보고가 있다[135].

그람음성균 감염의 위험인자를 가진 환자와 gonococci 감염의 가능성이 있는 환자는 ceftriaxone을 사용한다(AII).

### (2) 선택적 항균제 치료

관절액의 그람염색 결과에 따라서 항균제를 변경해야 한다(AII). 초기에 경험적으로 광범위 항균제를 사용한 경우는 동정된 원인균에 따라 각각 권장되는 선택적 항균제로 변경해야 한다(Table 11). 이후 배양된 균주의 항균제 감수성 결과에 따라서 치료 항균제를 유지 또는 변경해야 한다(AII)(Table 12).

### (3) 항균제 치료 기간

항균제의 총 치료 기간, 주사용 항균제의 사용기간, 경구용 항균제로의 변환 가능시기에 대해서는 아직까지 충분한 연구가 없다. 일반적으로 전제 항균제 치료 기간은 4-6주 이상이며, 적어도 초기 2주 이상 주사용 항균제 치료 후 증상이 호전되면 경구전환을 고려할 수 있다(CIII). 항균제의 종료시기는 관절 증상 및 진찰소견의 호전과 급성 염증 반응을 나타내는 ESR, CRP 등의 검사 결과를 참고하여 결정한다(CIII).

*N. gonorrhoeae*에 의한 화농성 관절염은 대개 파종성 임균 감염증에 동반되어 나타나며 이런 경우 7-10일간의 치료로도 충분한 효과가 있다[136].

### (4) 배양음성 화농성 관절염의 치료

배양음성 화농성 관절염은 관절의 전반적인 호전 양상에 따라 경험적으로 사용한 항균제를 지속 처방하며 관절 증상의 호전과 ESR, CRP를 참조하여 치료할 수 있다(BII). 배양 음성 환자는 추후에 다른 염증성 관절염으로 확인되기도 한다. 한 연구에서 화농성 관절염 환자의 19%에서 배양 음성이었으며, 이 중 14%는 추후에 류마티스 질환으로 확인되었다[114].

### (5) 화농성 관절염의 배액 및 수술적 치료

화농성 관절염에 대한 전신적 항균제 치료와 더불어 초기에 관절

**Table 11.** Selection of antimicrobial agents based on Gram stain results

| Gram stain result     |                                                                 | Antibiotics                                                                                                                                                                                                                                                                                                                                                                              |
|-----------------------|-----------------------------------------------------------------|------------------------------------------------------------------------------------------------------------------------------------------------------------------------------------------------------------------------------------------------------------------------------------------------------------------------------------------------------------------------------------------|
| Gram-positive cocci   | Low risk of Methicillin resistant <i>Staphylococcus aureus</i>  | 2.0 g cefazolin every 8 hours<br>or 1.0–2.0 g nafcillin every 4 hours<br>or 3.0 g ampicillin/sulbactam every 6 hours<br>*with/without gentamycin (5 mg/kg)<br>*If anaphylactic history with penicillin:<br>1.0 g vancomycin every 12 hours (trough concentration of vancomycin should be 15–20 µg/mL)<br>or 400 mg teicoplanin every 24 hours (first day 400 mg; every 12-hours loading) |
| Gram-positive cocci   | High risk of Methicillin resistant <i>Staphylococcus aureus</i> | 1.0 g vancomycin every 12 hours (trough concentration of vancomycin should be 15–20 µg/mL)<br>or 400 mg teicoplanin every 24 hours (first day 400 mg; every 12-hours loading)                                                                                                                                                                                                            |
| Gram-negative bacilli |                                                                 | 2.0 g ceftriaxone every 24 hours<br>*If allergic to ceftriaxone:<br>750 mg levofloxacin every 24 hours<br>or 400 mg ciprofloxacin every 12 hours                                                                                                                                                                                                                                         |
| Gram-negative cocci   |                                                                 | 1.0 g ceftriaxone every 24 hours (intravenous or intramuscular route)                                                                                                                                                                                                                                                                                                                    |

**Table 12.** Selection of antimicrobial agents based on the results of bacterial culture and antibiotic susceptibility testing

| Major pathogen                                       | Primary                                                                                                                                                                      | Alternative                                                                                                                                                                                                                                                                                                  |
|------------------------------------------------------|------------------------------------------------------------------------------------------------------------------------------------------------------------------------------|--------------------------------------------------------------------------------------------------------------------------------------------------------------------------------------------------------------------------------------------------------------------------------------------------------------|
| Methicillin susceptible <i>Staphylococcus aureus</i> | 1.0–2.0 g nafcillin every 4 hours or 2.0 g cefazolin every 8 hours                                                                                                           | 3.0 g ampicillin/sulbactam every 6 hours<br>*with/without gentamicin (5 mg/kg)<br>*If anaphylactic history with penicillin:<br>1.0 g vancomycin every 12 hours (trough concentration of vancomycin should be 15–20 µg/mL)<br>or 400 mg teicoplanin every 24 hours (first day 400 mg; every 12-hours loading) |
| Methicillin-resistant <i>Staphylococcus aureus</i>   | 1.0 g vancomycin every 12 hours (trough concentration of vancomycin should be 15–20 µg/mL)<br>or 400 mg teicoplanin every 24 hours (first day 400 mg every 12-hours loading) | 600 mg linezolid every 12 hours                                                                                                                                                                                                                                                                              |
| <i>Streptococcus</i> spp.                            | 3–4 million units penicillin G every 4–6 hours<br>or 20 million units 24-hours continuous infusion<br>or 2.0 g cefazolin every 8 hours                                       | 2.0 g ceftriaxone every 24 hours<br>or 750 mg levofloxacin every 24 hours                                                                                                                                                                                                                                    |
| Enterobacteriaceae, quinolone-susceptible            | 400 mg ciprofloxacin every 12 hours<br>or 750 mg levofloxacin every 24 hours                                                                                                 | 2.0 g ceftriaxone every 24 hours                                                                                                                                                                                                                                                                             |
| Enterobacteriaceae, quinolone-resistant              | Ceftriaxone 2.0 g every 12 hours                                                                                                                                             |                                                                                                                                                                                                                                                                                                              |
| Enterobacteriaceae, ESBL producer                    | 1.0 g ertapenem every 24 hours<br>or 500 mg imipenem every 6 hours<br>or 1.0 g meropenem every 8 hours                                                                       |                                                                                                                                                                                                                                                                                                              |
| <i>Neisseria gonorrhoeae</i>                         | 1.0 g ceftriaxone every 24 hours                                                                                                                                             | 1.0 g cefotaxime every 8 hours                                                                                                                                                                                                                                                                               |
| <i>Pseudomonas aeruginosa</i>                        | 2.0 g ceftazidime every 8 hours                                                                                                                                              | 2.0 g ceftazidime every 8 hours<br>or 4.5 g piperacillin-tazobactam every 8 hours<br>or 500 mg imipenem every 6 hours<br>or 1.0 g meropenem every 8 hours                                                                                                                                                    |
| Mixed anaerobes                                      | 3.0 g ampicillin-sulbactam every 6 hours                                                                                                                                     | 500 mg metronidazole every 8 hours<br>or 600 mg clindamycin every 8 hours                                                                                                                                                                                                                                    |

의 충분한 배농을 시행해야 한다(AII). 감염된 관절은 가능한 초기 관절천자를 실시하고 24-48시간까지 반복적 관절 천자 및 항균제 치료에 반응하지 않는 경우 수술적 치료를 시행한다. 초기 진단과 배액과정에서 관절천자로 배액이 용이치 않은 경우에는 최대한 조기에 수술적 치료를 시행한다(AIII).

화농성 관절염에서 배액의 방법에 따른 치료 효과에 관한 연구는 충분치 않지만 동물 연구에서는 수술적 배액 및 세척(lavage)이 관절의 손상 및 회복에 반복적 천자보다 도움이 된다는 보고가 있었다. 그러나 사람을 대상으로 한 제한적인 후향적 임상연구에서는 두 치료법 사이에 예후의 차이를 보이지 않았다는 보고가 있다[137]. 최근 화농성 관절염에서 관절경 수술이 일반적으로 시행되면서 배농 및 활막절제술(synovectomy)을 조기에 시행한 경우에 관절의 기능적인 회복에 도움이 된다는 보고가 있다[138].

관절 배액의 방법은 환자의 기저질환, 관절염의 중증도, 수술 및 마취와 관련된 이환(morbidity)를 고려하여 내과 의사와 정형외과 의사의 긴밀한 협조 하에 결정할 필요가 있다.

## 맺음말

### 1. 제한점

감염질환은 지역 및 국가마다 원인균 혹은 항균제 감수성이 달라서 국내현실에 맞는 지침이 나오려면 국내의 충분한 자료의 축적이 필요하다. 이번 지침에 참고할 수 있는 국내 문헌이 매우 부족하여서 현실을 충분히 반영하지 못한 면이 있다. 추후 지속적인 연구를 통하여 이번 지침의 개정이 필요할 것으로 본다. 또한 진료지침은 임상 진료 시 사용할 수 있는 표준적인 권고안이며, 각각의 환자에 적용될 때에는 전문가의 의견에 따라 달라질 수 있는 것으로 절대적인 기준이 될 수는 없음을 밝힌다.

### 2. 개정계획

본 진료지침은 3년마다 갱신할 계획이 있으며, 2013년 7월을 기준으로 하여 3년이 지난 시점까지 3년간의 최신 근거를 검색하여 갱신하고자 한다.

### 3. Conflict of Interest

본 진료지침은 대한화학요법학회의 지원에 의하여 이루어진 것이다. 본 연구에 참여한 지침 개발위원회(대한화학요법학회, 대한감염학회, 대한정형외과학회)는 연구비 지원이 최종 권고에 영향을 미치지 않았음을 밝히며, 본 지침제정에 있어서 대한화학요법학회에서 제공하는 연구비 외에 다른 어떤 연구비를 제공받지 않았으며, 다른 이익단체의 영향을 받지 않았음을 밝힌다.

## References

- Carek PJ, Dickerson LM, Sack JL. Diagnosis and management of osteomyelitis. *Am Fam Physician* 2001;63:2413-20.
- Waldvogel FA, Medoff G, Swartz MN. Osteomyelitis: a review of clinical features, therapeutic considerations and unusual aspects. *N Engl J Med* 1970;282:198-206.
- Lew DP, Waldvogel FA. Osteomyelitis. *Lancet* 2004;364:369-79.
- Cierny G, Mader JT, Pennick JJ. A clinical staging system for adult osteomyelitis. *Contemp Orthop* 1985;10:17-37.
- Esposito S, Leone S, Bassetti M, Borrelli S, Leoncini F, Meani E, Venditti M, Mazzotta F; Bone Joint Infections Committee for the Italian Society of Infectious Tropical Diseases (SIMIT). Italian guidelines for the diagnosis and infectious disease management of osteomyelitis and prosthetic joint infections in adults. *Infection* 2009;37:478-96.
- Lew DP, Waldvogel FA. Osteomyelitis. *N Engl J Med* 1997;336:999-1007.
- Kim CJ, Song KH, Park WB, Kim ES, Park SW, Kim HB, Oh MD, Kim NJ. Microbiologically and clinically diagnosed vertebral osteomyelitis: impact of prior antibiotic exposure. *Antimicrob Agents Chemother* 2012;56:2122-4.
- Kim YI, Kim SE, Jang HC, Jung SI, Song SK, Park KH. Analysis of the clinical characteristics and prognostic factors of infectious spondylitis. *Infect Chemother* 2011;43:48-54.
- Dirschl DR, Almekinders LC. Osteomyelitis. Common causes and treatment recommendations. *Drugs* 1993;45:29-43.
- Perry M. Erythrocyte sedimentation rate and C reactive protein in the assessment of suspected bone infection--are they reliable indices? *J R Coll Surg Edinb* 1996;41:116-8.
- Unkila-Kallio L, Kallio MJ, Eskola J, Peltola H. Serum C-reactive protein, erythrocyte sedimentation rate, and white blood cell count in acute hematogenous osteomyelitis of children. *Pediatrics* 1994;93:59-62.
- Zimmerli W, Trampuz A, Ochsner PE. Prosthetic-joint infections. *N Engl J Med* 2004;351:1645-54.
- Tumeh SS, Tohmeh AG. Nuclear medicine techniques in septic arthritis and osteomyelitis. *Rheum Dis Clin North Am* 1991;17:559-83.
- Kapoor A, Page S, Lavalley M, Gale DR, Felson DT. Magnetic resonance imaging for diagnosing foot osteomyelitis: a meta-analysis. *Arch Intern Med* 2007;167:125-32.
- Mackowiak PA, Jones SR, Smith JW. Diagnostic value of sinus-tract cultures in chronic osteomyelitis. *JAMA*

- 1978;239:2772-5.
16. Darouiche RO, Landon GC, Klima M, Musher DM, Markowski J. Osteomyelitis associated with pressure sores. *Arch Intern Med* 1994;154:753-8.
17. Garcia LS, Isenberg HD. *Clinical microbiology procedures handbook*. 3rd ed. Washington, DC: ASM Press; 2010.
18. Nolla JM, Ariza J, Gomez-Vaquero C, Fiter J, Bermejo J, Valverde J, Escofet DR, Gudiol F. Spontaneous pyogenic vertebral osteomyelitis in nondrug users. *Semin Arthritis Rheum* 2002;31:271-8.
19. Patzakis MJ, Rao S, Wilkins J, Moore TM, Harvey PJ. Analysis of 61 cases of vertebral osteomyelitis. *Clin Orthop Relat Res* 1991;178-83.
20. White LM, Schweitzer ME, Deely DM, Gannon F. Study of osteomyelitis: utility of combined histologic and microbiologic evaluation of percutaneous biopsy samples. *Radiology* 1995;197:840-2.
21. Colmenero JD, Morata P, Ruiz-Mesa JD, Bautista D, Bermúdez P, Bravo MJ, Queipo-Ortuño MI. Multiplex real-time polymerase chain reaction: a practical approach for rapid diagnosis of tuberculous and brucellar vertebral osteomyelitis. *Spine (Phila Pa 1976)* 2010;35:E1392-6.
22. Fenollar F, Roux V, Stein A, Drancourt M, Raoult D. Analysis of 525 samples to determine the usefulness of PCR amplification and sequencing of the 16S rRNA gene for diagnosis of bone and joint infections. *J Clin Microbiol* 2006;44:1018-28.
23. Le Saux N, Howard A, Barrowman NJ, Gaboury I, Sampson M, Moher D. Shorter courses of parenteral antibiotic therapy do not appear to influence response rates for children with acute hematogenous osteomyelitis: a systematic review. *BMC Infect Dis* 2002;2:16.
24. Learmonth ID, Dall G, Pollock DJ. Acute osteomyelitis and septic arthritis in children. A simple approach to treatment. *S Afr Med J* 1984;65:117-20.
25. Haidar R, Der Boghossian A, Atiyeh B. Duration of post-surgical antibiotics in chronic osteomyelitis: empiric or evidence-based? *Int J Infect Dis* 2010;14:e752-8.
26. Salvana J, Rodner C, Browner BD, Livingston K, Schreiber J, Pesanti E. Chronic osteomyelitis: results obtained by an integrated team approach to management. *Conn Med* 2005;69:195-202.
27. Lazzarini L, Mader JT, Calhoun JH. Osteomyelitis in long bones. *J Bone Joint Surg Am* 2004;86-A:2305-18.
28. Calhoun JH, Manring MM, Shirliff M. Osteomyelitis of the long bones. *Semin Plast Surg* 2009;23:59-72.
29. Cierny G 3rd. Chronic osteomyelitis: results of treatment. *Instr Course Lect* 1990;39:495-508.
30. Cierny G 3rd. Surgical treatment of osteomyelitis. *Plast Reconstr Surg* 2011;127 (Suppl 1):190S-204S.
31. Grados F, Lescure FX, Senneville E, Flipo RM, Schmit JL, Fardellone P. Suggestions for managing pyogenic (non-tuberculous) discitis in adults. *Joint Bone Spine* 2007;74:133-9.
32. Spellberg B, Lipsky BA. Systemic antibiotic therapy for chronic osteomyelitis in adults. *Clin Infect Dis* 2012;54:393-407.
33. Cottle L, Riordan T. Infectious spondylodiscitis. *J Infect* 2008;56:401-12.
34. Norden CW, Bryant R, Palmer D, Montgomerie JZ, Wheat J. Chronic osteomyelitis caused by *Staphylococcus aureus*: controlled clinical trial of nafcillin therapy and nafcillin-ri-fampin therapy. *South Med J* 1986;79:947-51.
35. Norden CW, Fierer J, Bryant RE. Chronic staphylococcal osteomyelitis: treatment with regimens containing rifampin. *Rev Infect Dis* 1983;5 (Suppl 3):S495-501.
36. Zimmerli W. Clinical practice. Vertebral osteomyelitis. *N Engl J Med* 2010;362:1022-9.
37. Kim HB, Jang HC, Nam HJ, Lee YS, Kim BS, Park WB, Lee KD, Choi YJ, Park SW, Oh MD, Kim EC, Choe KW. In vitro activities of 28 antimicrobial agents against *Staphylococcus aureus* isolates from tertiary-care hospitals in Korea: a nationwide survey. *Antimicrob Agents Chemother* 2004;48:1124-7.
38. Lee K, Kim MN, Kim JS, Hong HL, Kang JO, Shin JH, Park YJ, Yong D, Jeong SH, Chong Y; KONSAR Group. Further increases in carbapenem-, amikacin-, and fluoroquinolone-resistant isolates of *Acinetobacter* spp. and *P. aeruginosa* in Korea: KONSAR study 2009. *Yonsei Med J* 2011;52:793-802.
39. Lee SJ, Lee DS, Choe HS, Shim BS, Kim CS, Kim ME, Cho YH. Antimicrobial resistance in community-acquired urinary tract infections: results from the Korean Antimicrobial Resistance Monitoring System. *J Infect Chemother* 2011;17:440-6.
40. Fass RJ. Treatment of osteomyelitis and septic arthritis with cefazolin. *Antimicrob Agents Chemother* 1978;13:405-11.
41. Zeller V, Durand F, Kitzis MD, Lhotellier L, Ziza JM, Mamoudy P, Desplaces N. Continuous cefazolin infusion to treat bone and joint infections: clinical efficacy, feasibility, safety, and serum and bone concentrations. *Antimicrob Agents Chemother* 2009;53:883-7.
42. Lazzarini L, Lipsky BA, Mader JT. Antibiotic treatment of osteomyelitis: what have we learned from 30 years of clinical

- cal trials? Int J Infect Dis 2005;9:127-38.
43. Löffler L, Bauernfeind A, Keyl W, Hoffstedt B, Piergies A, Lenz W. An open, comparative study of sulbactam plus ampicillin vs. cefotaxime as initial therapy for serious soft tissue and bone and joint infections. Rev Infect Dis 1986;8 (Suppl 5):S593-8.
44. Gisby J, Beale AS, Bryant JE, Toseland CD. Staphylococcal osteomyelitis--a comparison of co-amoxiclav with clindamycin and flucloxacillin in an experimental rat model. J Antimicrob Chemother 1994;34:755-64.
45. Landersdorfer CB, Kinzig M, Bulitta JB, Hennig FE, Holzgrabe U, Sorgel F, Gusinde J. Bone penetration of amoxicillin and clavulanic acid evaluated by population pharmacokinetics and Monte Carlo simulation. Antimicrob Agents Chemother 2009;53:2569-78.
46. Tice AD, Hoaglund PA, Shoultz DA. Risk factors and treatment outcomes in osteomyelitis. J Antimicrob Chemother 2003;51:1261-8.
47. Tice AD, Hoaglund PA, Shoultz DA. Outcomes of osteomyelitis among patients treated with outpatient parenteral antimicrobial therapy. Am J Med 2003;114:723-8.
48. Kaplan SL, Mason EO Jr, Feigin RD. Clindamycin versus nafcillin or methicillin in the treatment of *Staphylococcus aureus* osteomyelitis in children. South Med J 1982;75:138-42.
49. Rodriguez W, Ross S, Khan W, McKay D, Moskowitz P. Clindamycin in the treatment of osteomyelitis in children: a report of 29 cases. Am J Dis Child 1977;131:1088-93.
50. Guglielmo BJ, Lubner AD, Paletta D Jr, Jacobs RA. Ceftriaxone therapy for staphylococcal osteomyelitis: a review. Clin Infect Dis 2000;30:205-7.
51. Blumberg HM, Rimland D, Carroll DJ, Terry P, Wachsmuth IK. Rapid development of ciprofloxacin resistance in methicillin-susceptible and -resistant *Staphylococcus aureus*. J Infect Dis 1991;163:1279-85.
52. Karamanis EM, Matthaiou DK, Moraitis LI, Falagas ME. Fluoroquinolones versus beta-lactam based regimens for the treatment of osteomyelitis: a meta-analysis of randomized controlled trials. Spine (Phila Pa 1976) 2008;33:E297-304.
53. Spellberg B, Lipsky BA. Systemic antibiotic therapy for chronic osteomyelitis in adults. Clin Infect Dis 2012;54:393-407.
54. Dombrowski JC, Winston LG. Clinical failures of appropriately-treated methicillin-resistant *Staphylococcus aureus* infections. J Infect 2008;57:110-5.
55. Sheftel TG, Mader JT, Pennick JJ, Cierny G 3rd. Methicillin-resistant *Staphylococcus aureus* osteomyelitis. Clin Orthop Relat Res 1985:231-9.
56. Liu C, Bayer A, Cosgrove SE, Daum RS, Fridkin SK, Gorwitz RJ, Kaplan SL, Karchmer AW, Levine DP, Murray BE, J Rybak M, Talan DA, Chambers HF; Infectious Diseases Society of America. Clinical practice guidelines by the infectious diseases society of america for the treatment of methicillin-resistant *Staphylococcus aureus* infections in adults and children. Clin Infect Dis 2011;52:e18-55.
57. Weinberg WG. Safety and efficacy of teicoplanin for bone and joint infections: results of a community-based trial. South Med J 1993;86:891-7.
58. Ascione T, Iannece MD, Rosario P, Pempinello R, Pagliano P, Conte M, Pempinello C, Rotondo R, Mariconda M, Lepore S. Impact of therapeutic choices on outcome of osteomyelitis caused by MRSA. J Infect 2011;63:102-4.
59. Crompton JA, North DS, McConnell SA, Lamp KC. Safety and efficacy of daptomycin in the treatment of osteomyelitis: results from the CORE Registry. J Chemother 2009;21:414-20.
60. Finney MS, Crank CW, Segreti J. Use of daptomycin to treat drug-resistant Gram-positive bone and joint infections. Curr Med Res Opin 2005;21:1923-6.
61. Lai CC, Sheng WH, Wang JT, Liao CH, Ho MW, Chen CJ, Chen DL, Chou MU, Lee CM, Lin YC, Pong MY, Chang SC. Safety and efficacy of daptomycin for the treatment of hospitalized adult patients in Taiwan with severe staphylococcal infections. J Microbiol Immunol Infect 2012;45:52-7.
62. Lamp KC, Friedrich LV, Mendez-Vigo L, Russo R. Clinical experience with daptomycin for the treatment of patients with osteomyelitis. Am J Med 2007;120 (10 Suppl 1):S13-20.
63. Skiess DJ. Treatment failure resulting from resistance of *Staphylococcus aureus* to daptomycin. J Clin Microbiol 2006;44:655-6.
64. Aneziokoro CO, Cannon JP, Pachucki CT, Lentino JR. The effectiveness and safety of oral linezolid for the primary and secondary treatment of osteomyelitis. J Chemother 2005;17:643-50.
65. Broder KW, Moise PA, Schultz RO, Forrest A, Schentag JJ. Clinical experience with linezolid in conjunction with wound coverage techniques for skin and soft-tissue infections and postoperative osteomyelitis. Ann Plast Surg 2004;52:385-90.
66. Howden BP, Ward PB, Charles PG, Korman TM, Fuller A, du Cros P, Grabsch EA, Roberts SA, Robson J, Read K, Bak N, Hurley J, Johnson PD, Morris AJ, Mayall BC, Grayson ML. Treatment outcomes for serious infections caused by

- methicillin-resistant *Staphylococcus aureus* with reduced vancomycin susceptibility. Clin Infect Dis 2004;38:521-8.
67. Rao N, Hamilton CW. Efficacy and safety of linezolid for Gram-positive orthopedic infections: a prospective case series. Diagn Microbiol Infect Dis 2007;59:173-9.
  68. Rayner CR, Baddour LM, Birmingham MC, Norden C, Meagher AK, Schentag JJ. Linezolid in the treatment of osteomyelitis: results of compassionate use experience. Infection 2004;32:8-14.
  69. Drew RH, Perfect JR, Srinath L, Kurkimilis E, Dowzicky M, Talbot GH. Treatment of methicillin-resistant *Staphylococcus aureus* infections with quinupristin-dalfopristin in patients intolerant of or failing prior therapy. J Antimicrob Chemother 2000;46:775-84.
  70. Yin LY, Lazzarini L, Li F, Stevens CM, Calhoun JH. Comparative evaluation of tigecycline and vancomycin, with and without rifampicin, in the treatment of methicillin-resistant *Staphylococcus aureus* experimental osteomyelitis in a rabbit model. J Antimicrob Chemother 2005;55:995-1002.
  71. Perlroth J, Kuo M, Tan J, Bayer AS, Miller LG. Adjunctive use of rifampin for the treatment of *Staphylococcus aureus* infections: a systematic review of the literature. Arch Intern Med 2008;168:805-19.
  72. Van der Auwera P, Klastersky J, Thys JP, Meunier-Carpentier F, Legrand JC. Double-blind, placebo-controlled study of oxacillin combined with rifampin in the treatment of staphylococcal infections. Antimicrob Agents Chemother 1985;28:467-72.
  73. Daver NG, Shelburne SA, Atmar RL, Giordano TP, Stager CE, Reitman CA, White AC Jr. Oral step-down therapy is comparable to intravenous therapy for *Staphylococcus aureus* osteomyelitis. J Infect 2007;54:539-44.
  74. Zimmerli W, Widmer AF, Blatter M, Frei R, Ochsner PE. Role of rifampin for treatment of orthopedic implant-related staphylococcal infections: a randomized controlled trial. Foreign-Body Infection (FBI) Study Group. JAMA 1998;279:1537-41.
  75. Viale P, Furlanut M, Scudeller L, Pavan F, Negri C, Crapis M, Zamparini E, Zuiani C, Cristini F, Pea F. Treatment of pyogenic (non-tuberculous) spondylodiscitis with tailored high-dose levofloxacin plus rifampicin. Int J Antimicrob Agents 2009;33:379-82.
  76. Zander J, Besier S, Ackermann H, Wichelhaus TA. Synergistic antimicrobial activities of folic acid antagonists and nucleoside analogs. Antimicrob Agents Chemother 2010;54:1226-31.
  77. Zander J, Besier S, Faetke S, Saum SH, Müller V, Wichelhaus TA. Antimicrobial activities of trimethoprim/sulfamethoxazole, 5-iodo-2'-deoxyuridine and rifampicin against *Staphylococcus aureus*. Int J Antimicrob Agents 2010;36:562-5.
  78. Nguyen S, Pasquet A, Legout L, Beltrand E, Dubreuil L, Migaud H, Yazdanpanah Y, Senneville E. Efficacy and tolerance of rifampicin-linezolid compared with rifampicin-cotrimoxazole combinations in prolonged oral therapy for bone and joint infections. Clin Microbiol Infect 2009;15:1163-9.
  79. Kim BN. Oral agents for the treatment of orthopedic infections caused by methicillin-resistant staphylococci. Infect Chemother 2011;43:322-38.
  80. Atkins B, Gottlieb T. Fusidic acid in bone and joint infections. Int J Antimicrob Agents 1999;12 (Suppl 2):S79-93.
  81. Howden BP, Grayson ML. Dumb and dumber--the potential waste of a useful antistaphylococcal agent: emerging fusidic acid resistance in *Staphylococcus aureus*. Clin Infect Dis 2006;42:394-400.
  82. Jung LY, Lee CS. Appropriate oral antibiotics for the treatment of culture negative orthopedic infections. Infect Chemother 2011;43:432-3.
  83. Pavoni GL, Falcone M, Baiocchi P, Tarasi A, Cassone M, Serra P, Venditti M. Conservative medical therapy of infections following osteosynthesis: a retrospective analysis of a six-year experience. J Chemother 2002;14:378-83.
  84. Fang RC, Galiano RD. Adjunctive therapies in the treatment of osteomyelitis. Semin Plast Surg 2009;23:141-7.
  85. Esterhai JL Jr, Pisarello J, Brighton CT, Heppenstall RB, Gellman H, Goldstein G. Adjunctive hyperbaric oxygen therapy in the treatment of chronic refractory osteomyelitis. J Trauma 1987;27:763-8.
  86. Klemm K. Gentamicin-PMMA-beads in treating bone and soft tissue infections (author's transl). Zentralbl Chir 1979;104:934-42.
  87. Quinones-Hinojosa A, Jun P, Jacobs R, Rosenberg WS, Weinstein PR. General principles in the medical and surgical management of spinal infections: a multidisciplinary approach. Neurosurg Focus 2004;17:E1.
  88. Darouiche RO. Spinal epidural abscess. N Engl J Med 2006;355:2012-20.
  89. Gouliouris T, Aliyu SH, Brown NM. Spondylodiscitis: update on diagnosis and management. J Antimicrob Chemother 2010;65 (Suppl 3):iii11-24.
  90. Siddiq F, Chowfin A, Tight R, Sahnoun AE, Smego RA Jr. Medical vs surgical management of spinal epidural ab-

- success. Arch Intern Med 2004;164:2409-12.
91. Kowalski TJ, Berbari EF, Huddleston PM, Steckelberg JM, Mandrekar JN, Osmon DR. The management and outcome of spinal implant infections: contemporary retrospective cohort study. Clin Infect Dis 2007;44:913-20.
92. Carragee EJ, Kim D, van der Vlugt T, Vittum D. The clinical use of erythrocyte sedimentation rate in pyogenic vertebral osteomyelitis. Spine (Phila Pa 1976) 1997;22:2089-93.
93. Coakley G, Mathews C, Field M, Jones A, Kingsley G, Walker D, Phillips M, Bradish C, McLachlan A, Mohammed R, Weston V; British Society for Rheumatology Standards, Guidelines and Audit Working Group. BSR & BHPR, BOA, RCGP and BSAC guidelines for management of the hot swollen joint in adults. Rheumatology (Oxford) 2006;45:1039-41.
94. Weston V, Coakley G; British Society for Rheumatology (BSR) Standards, Guidelines and Audit Working Group; British Society for Antimicrobial Chemotherapy; British Orthopaedic Association; Royal College of General Practitioners; British Health Professionals in Rheumatology. Guideline for the management of the hot swollen joint in adults with a particular focus on septic arthritis. J Antimicrob Chemother 2006;58:492-3.
95. Brook I, Frazier EH. Anaerobic osteomyelitis and arthritis in a military hospital: a 10-year experience. Am J Med 1993;94:21-8.
96. Euba G, Murillo O, Fernández-Sabé N, Mascaró J, Cabo J, Pérez A, Tubau F, Verdaguer R, Gudiol F, Ariza J. Long-term follow-up trial of oral rifampin-cotrimoxazole combination versus intravenous cloxacillin in treatment of chronic staphylococcal osteomyelitis. Antimicrob Agents Chemother 2009;53:2672-6.
97. Gupta MN, Sturrock RD, Field M. A prospective 2-year study of 75 patients with adult-onset septic arthritis. Rheumatology (Oxford) 2001;40:24-30.
98. Ispahani P, Weston VC, Turner DP, Donald FE. Septic arthritis due to Streptococcus pneumoniae in Nottingham, United Kingdom, 1985-1998. Clin Infect Dis 1999;29:1450-4.
99. Rhee YG, Cho NS, Kim BH, Ha JH. Injection-induced pyogenic arthritis of the shoulder joint. J Shoulder Elbow Surg 2008;17:63-7.
100. Saraux A, Taelman H, Blanche P, Batungwanayo J, Clerinx J, Kagame A, Kabagabo L, Ladner J, Van de Perre P, Le Goff P, Bogaerts J. HIV infection as a risk factor for septic arthritis. Br J Rheumatol 1997;36:333-7.
101. Seo SS, Ha DJ, Kim CW, Kim KW, Seo JH. Etiologic transition of septic arthritis of the knee. J Korean Knee Soc 2008;20:44-9.
102. Weston VC, Jones AC, Bradbury N, Fawthrop F, Doherty M. Clinical features and outcome of septic arthritis in a single UK Health District 1982-1991. Ann Rheum Dis 1999;58:214-9.
103. Dubost JJ, Soubrier M, De Champs C, Ristori JM, Bussière JL, Sauvezie B. No changes in the distribution of organisms responsible for septic arthritis over a 20 year period. Ann Rheum Dis 2002;61:267-9.
104. Arnold SR, Elias D, Buckingham SC, Thomas ED, Novais E, Arkader A, Howard C. Changing patterns of acute haematogenous osteomyelitis and septic arthritis: emergence of community-associated methicillin-resistant *Staphylococcus aureus*. J Pediatr Orthop 2006;26:703-8.
105. Millar BC, Loughrey A, Elborn JS, Moore JE. Proposed definitions of community-associated methicillin-resistant *Staphylococcus aureus* (CA-MRSA). J Hosp Infect 2007;67:109-13.
106. Kim ES, Song JS, Lee HJ, Choe PG, Park KH, Cho JH, Park WB, Kim SH, Bang JH, Kim DM, Park KU, Shin S, Lee MS, Choi HJ, Kim NJ, Kim EC, Oh MD, Kim HB, Choe KW. A survey of community-associated methicillin-resistant *Staphylococcus aureus* in Korea. J Antimicrob Chemother 2007;60:1108-14.
107. Chen WH, Jiang LS, Dai LY. Surgical treatment of pyogenic vertebral osteomyelitis with spinal instrumentation. Eur Spine J 2007;16:1307-16.
108. Walker DJ, Young I, Hassey GA, Smith AM, Goring M, Platt PN. The acute hot joint in medical practice. J R Coll Physicians Lond 1995;29:101-4.
109. Kim H, Kim J, Ihm C. The usefulness of multiplex PCR for the identification of bacteria in joint infection. J Clin Lab Anal 2010;24:175-81.
110. Cooke CL, Owen DS Jr, Irby R, Toone E. Gonococcal arthritis. A survey of 54 cases. JAMA 1971;217:204-5.
111. Rompalo AM, Hook EW 3rd, Roberts PL, Ramsey PG, Handsfield HH, Holmes KK. The acute arthritis-dermatitis syndrome. The changing importance of Neisseria gonorrhoeae and Neisseria meningitidis. Arch Intern Med 1987;147:281-3.
112. Wise CM, Morris CR, Wasilaukas BL, Salzer WL. Gonococcal arthritis in an era of increasing penicillin resistance. Presentations and outcomes in 41 recent cases (1985-1991). Arch Intern Med 1994;154:2690-5.
113. Kaandorp CJ, Van Schaardenburg D, Krijnen P, Habbema JD, van de Laar MA. Risk factors for septic arthritis in patients with joint disease. A prospective study. Arthritis

- Rheum 1995;38:1819-25.
114. Eberst-Ledoux J, Tournadre A, Mathieu S, Mrozek N, Soubrier M, Dubost JJ. Septic arthritis with negative bacteriological findings in adult native joints: a retrospective study of 74 cases. *Joint Bone Spine* 2012;79:156-9.
  115. Gupta MN, Sturrock RD, Field M. Prospective comparative study of patients with culture proven and high suspicion of adult onset septic arthritis. *Ann Rheum Dis* 2003;62:327-31.
  116. Jeng GW, Wang CR, Liu ST, Su CC, Tsai RT, Yeh TS, Wen CL, Wu YQ, Lin CY, Lee GL, Chen MY, Liu MF, Chuang CY, Chen CY. Measurement of synovial tumor necrosis factor-alpha in diagnosing emergency patients with bacterial arthritis. *Am J Emerg Med* 1997;15:626-9.
  117. Shmerling RH, Delbanco TL, Tosteson AN, Trentham DE. Synovial fluid tests. What should be ordered? *JAMA* 1990;264:1009-14.
  118. Newman JH. Review of septic arthritis throughout the antibiotic era. *Ann Rheum Dis* 1976;35:198-205.
  119. Freed JF, Nies KM, Boyer RS, Louie JS. Acute monoarticular arthritis. A diagnostic approach. *JAMA* 1980;243:2314-6.
  120. Swan A, Amer H, Dieppe P. The value of synovial fluid assays in the diagnosis of joint disease: a literature survey. *Ann Rheum Dis* 2002;61:493-8.
  121. Fenollar F, Lévy PY, Raoult D. Usefulness of broad-range PCR for the diagnosis of osteoarticular infections. *Curr Opin Rheumatol* 2008;20:463-70.
  122. Jalava J, Skurnik M, Toivanen A, Toivanen P, Eerola E. Bacterial PCR in the diagnosis of joint infection. *Ann Rheum Dis* 2001;60:287-9.
  123. Tarkin IS, Henry TJ, Fey PI, Iwen PC, Hinrichs SH, Garvin KL. PCR rapidly detects methicillin-resistant staphylococci periprosthetic infection. *Clin Orthop Relat Res* 2003;89-94.
  124. Gardam M, Lim S. Mycobacterial osteomyelitis and arthritis. *Infect Dis Clin North Am* 2005;19:819-30.
  125. Kortekangas P, Aro HT, Tuominen J, Toivanen A. Synovial fluid leukocytosis in bacterial arthritis vs. reactive arthritis and rheumatoid arthritis in the adult knee. *Scand J Rheumatol* 1992;21:283-8.
  126. Pradere J, Buneaux JJ, Buneaux F, Fabiani P, Galmiche P, Birenbaum A. Analysis of the principal components of synovial fluid. *Nouv Presse Med* 1979;8:866-7.
  127. Söderquist B, Jones I, Fredlund H, Vikerfors T. Bacterial or crystal-associated arthritis? Discriminating ability of serum inflammatory markers. *Scand J Infect Dis* 1998;30:591-6.
  128. Margaretten ME, Kohlwes J, Moore D, Bent S. Does this adult patient have septic arthritis? *JAMA* 2007;297:1478-88.
  129. Coakley G, Mathews C, Field M, Jones A, Kingsley G, Walker D, Phillips M, Bradish C, McLachlan A, Mohammed R, Weston V; British Society for Rheumatology Standards, Guidelines and Audit Working Group. BSR & BHPR, BOA, RCGP and BSAC guidelines for management of the hot swollen joint in adults. *Rheumatology (Oxford)* 2006;45:1039-41.
  130. Hügler T, Schuetz P, Mueller B, Laifer G, Tyndall A, Regnass S, Daikeler T. Serum procalcitonin for discrimination between septic and non-septic arthritis. *Clin Exp Rheumatol* 2008;26:453-6.
  131. Brower AC. Septic arthritis. *Radiol Clin North Am* 1996;34:293-309, x.
  132. Graif M, Schweitzer ME, Deely D, Matteucci T. The septic versus nonseptic inflamed joint: MRI characteristics. *Skeletal Radiol* 1999;28:616-20.
  133. Learch TJ, Farooki S. Magnetic resonance imaging of septic arthritis. *Clin Imaging* 2000;24:236-42.
  134. Falagas ME, Siempos II, Papagelopoulos PJ, Vardakas KZ. Linezolid for the treatment of adults with bone and joint infections. *Int J Antimicrob Agents* 2007;29:233-9.
  135. Rouse MS, Steckelberg JM, Patel R. In vitro activity of cef-tobiprole, daptomycin, linezolid, and vancomycin against methicillin-resistant staphylococci associated with endocarditis and bone and joint infection. *Diagn Microbiol Infect Dis* 2007;58:363-5.
  136. Bardin T. Gonococcal arthritis. *Best Pract Res Clin Rheumatol* 2003;17:201-8.
  137. Manadan AM, Block JA. Daily needle aspiration versus surgical lavage for the treatment of bacterial septic arthritis in adults. *Am J Ther* 2004;11:412-5.
  138. Balabaud L, Gaudias J, Boeri C, Jenny JY, Kehr P. Results of treatment of septic knee arthritis: a retrospective series of 40 cases. *Knee Surg Sports Traumatol Arthrosc* 2007;15:387-92.
